# Supplementary material for: Personalised medicine in Canada: a survey of adoption and practice in oncology, cardiology and family medicine
Source: PubMed Central journal article supplement — BMJ Open. 2011 Jul 29;1(1):e000110. doi: 10.1136/bmjopen-2011-000110 (PMC3191410; doi:10.1136/bmjopen-2011-000110), 2011-07-29
Supplement: bmjopen-2011-000110.draft_revisions.pdf [file bmjopen-2011-000110.draft_revisions.pdf]

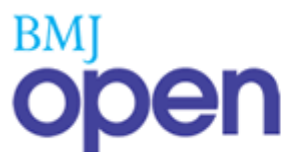

**Personalized Medicine in Canada: A Survey of Adoption and Practice in Oncology, Cardiology and Family Medicine**

|                               |                                                                                                                                                                                                                                                                                                    |
|-------------------------------|----------------------------------------------------------------------------------------------------------------------------------------------------------------------------------------------------------------------------------------------------------------------------------------------------|
| Journal:                      | <i>BMJ Open</i>                                                                                                                                                                                                                                                                                    |
| Manuscript ID:                | bmjopen-2011-000110                                                                                                                                                                                                                                                                                |
| Article Type:                 | Research                                                                                                                                                                                                                                                                                           |
| Date Submitted by the Author: | 28-Feb-2011                                                                                                                                                                                                                                                                                        |
| Complete List of Authors:     | Bonter, Katherine; Centre of Excellence in Personalized Medicine<br>Desjardins, Clarissa; Centre of Excellence in Personalized Medicine<br>Currier, Nathan; Centre of Excellence in Personalized Medicine<br>Pun, Jason; PricewaterhouseCoopers LLP<br>Ashbury, Fredrick; PICEPS Consultants, Inc. |
| <b>Subject Heading</b> :      | Genetics                                                                                                                                                                                                                                                                                           |
| Keywords:                     | physician practice, personalized medicine, genetic testing, physician behaviour, risk assessment, survey                                                                                                                                                                                           |
|                               |                                                                                                                                                                                                                                                                                                    |

SCHOLARONE™  
Manuscripts

only

1  
2  
3 **Personalized Medicine in Canada: A Survey of Adoption and Practice in Oncology, Cardiology and**  
4  
5 **Family Medicine**  
6

7  
8  
9 Corresponding Author: Dr. Clarissa Desjardins, 5000 rue Belanger Est

10  
11 Montréal, Québec, H1T 1C8, tel.514-670-7660; email: [cdesjardins@cepmed.com](mailto:cdesjardins@cepmed.com)  
12

13  
14  
15 Bonter, Katherine MSc<sup>1</sup>, Desjardins, Clarissa PhD<sup>1</sup>, Currier, Nathan PhD<sup>1</sup>, Pun, Jason MSc MBA<sup>2</sup>,  
16  
17 Ashbury, Fredrick PhD<sup>2,3,4</sup>  
18  
19

- 20  
21  
22  
23 1 Centre of Excellence in Personalized Medicine (Cepmed), Montreal, Québec, Canada  
24 2 PricewaterhouseCoopers LLP, Toronto, Ontario, Canada  
25 3 Division of Preventive Oncology, Department of Oncology, University of Calgary, Calgary,  
26 Alberta Canada  
27 4 Dalla Lana School of Public Health, University of Toronto, Toronto, Ontario, Canada  
28  
29  
30  
31  
32  
33  
34  
35

36 Keywords: personalized medicine, genetic testing, survey, physician behaviour, risk assessment  
37

38 Word count: 3,230  
39  
40  
41  
42  
43  
44  
45  
46  
47  
48  
49  
50  
51  
52  
53  
54  
55  
56  
57  
58  
59  
60

**ABSTRACT**

Canadian physicians were surveyed to understand roles, perceptions and experiences in genetic testing and personalized medicine (PM). The survey measured openness to adoption, practice, observed benefits and impacts, and barriers to adoption.

A self-administered survey was provided to Canadian oncologists, cardiologists and family physicians and responses were obtained online, by mail or by fax. The survey was designed to be exploratory. Comparisons of data were made across specialties and geography.

An overall response rate of 8.3% was obtained. Of the respondents, 43%, 30% and 27% were family physicians, cardiologists or oncologists respectively. A strong majority of respondents agreed that genetic testing and PM can have a positive impact on their practice however only 51% agreed that there is sufficient evidence to order such tests. A low percentage of respondents feel that they are sufficiently informed and confident practicing in this area, however many reported that genetic tests they have ordered have benefited their patients. Half of the respondents agreed that genetic tests that would be useful in their practice are not readily available. A lack of practice guidelines, limited provider knowledge and lack of evidence-based clinical information were cited as the main barriers to practice. Differences across provinces were observed for measures relating to access to testing and the state of practice. Differences across specialties were observed for the state of practice, reported benefits and access to testing.

Canadian physicians recognize the benefits of genetic testing and PM and are open to its adoption; however they lack the education, information and support needed to practice effectively in this area. Variability in practice and access to testing across specialties and across Canada was observed. These

1  
2  
3 results support a need for national strategies and resources to facilitate physician knowledge, training  
4  
5 and practice in PM.  
6  
7  
8  
9

## 10 **ARTICLE SUMMARY**

### 11 **Article Focus:**

- 12  
13  
14  
15  
16  
17  
18  
19  
20  
21  
22  
23  
24  
25  
26  
27  
28  
29  
30  
31  
32  
33  
34  
35  
36  
37  
38  
39  
40  
41  
42  
43  
44  
45  
46  
47  
48  
49  
50  
51  
52  
53  
54  
55  
56  
57  
58  
59  
60
- Canadian physicians' perceptions and experience relating to genetic testing and personalized medicine (PM)
- Practice and impact of genetic testing and PM in Canada and across specialties
- Implications for continued adoption of genetic testing and PM in Canada across specialties

### 23 **Key Messages:**

- 25  
26  
27  
28  
29  
30  
31  
32  
33  
34  
35  
36  
37  
38  
39  
40  
41  
42  
43  
44  
45  
46  
47  
48  
49  
50  
51  
52  
53  
54  
55  
56  
57  
58  
59  
60
- Family physicians, cardiologists and oncologists across Canada are practicing personalized medicine and recognize its benefits and potential impacts
- Physicians reported a number of barriers to the adoption of PM that are currently affecting medical practice in Canada
- The practice of and access to genetic testing and personalized medicine varies both across specialties and provinces that will have an impact on continued adoption in this area

## 37 **AUTHORS' CONTRIBUTIONS**

38  
39 All authors were involved in the design of the survey, interpretation of results and drafting the article.  
40  
41 In addition, Pun and Ashbury were involved in the implementation, data collection, and analysis. Three  
42  
43 co-authors (Desjardins, Bonter and Currier) are employed by Cepmed. Pun and Ashbury were employed  
44  
45 by PricewaterhouseCoopers LLP, and were commissioned by Cepmed to lead the survey project.  
46  
47  
48  
49  
50  
51  
52  
53  
54  
55  
56  
57  
58  
59  
60

## INTRODUCTION

*“for the sweet ones [treatments] do not benefit everyone, nor do the astringent ones, nor are all the patients able to drink the same things”*  
*(Hippocrates)*

Personalized medicine (PM), the tailoring of medical treatment or prevention to the individual characteristics of each patient, has been enabled by recent advances in molecular biology (1). Research in the ‘-omic’ sciences has resulted in improved understanding of the relationships between genes, proteins and disease, providing more tools for PM (2-5) and driving a shift in medical practice (6). Evidence of this ‘shift’ include a 66% increase in cancer-related genetic testing in Ontario between 2002 and 2008 (7), the fact that 10% of FDA approved drugs include pharmacogenomic information on their labels (8), and that genetic testing is recommended or required for at least 11 FDA approved drugs (9) and for 10 Health Canada approved drugs (based on a review of drug labeling using the Health Canada Drug Product Database). A number of applications of PM based on genetic testing are currently in use (10). Pharmacogenomics, the optimization of drug therapy based on genetic information, has been applied to improve clinical outcomes or reduce side effects and adverse events (11, 12). Targeted therapeutics, used in combination with companion diagnostics has been particularly successful in improving the treatment of cancer (13, 14). Finally, PM is being used to assess disease risk, facilitating prevention and early detection (15).

As a result of these developments PM has become an increasingly important topic for physicians, healthcare organizations and the public (16-17). There is widespread debate as to the intended and unintended consequences of PM on the quality and cost of healthcare, however many scientific and medical leaders expect PM to increase the quality of healthcare and reduce overall healthcare costs (13,18,19).

1  
2  
3 A few studies have assessed the adoption of genetic testing and its impact on the role and practice of  
4  
5 physicians in Canada (20-24). These studies focused primarily on the adoption of genetic tests for  
6  
7 diagnosis and treatment of cancer within Ontario's healthcare system, as well as the needs and  
8  
9 recommendations for physician education, public education and improved coordination of healthcare  
10  
11 delivery and genetic testing services. The present pan-Canadian survey of practicing oncologists,  
12  
13 cardiologists and family doctors was designed to provide baseline data relating to genetic testing as a  
14  
15 key element of PM in Canada with respect to openness to adoption, state of practice, and barriers to  
16  
17 adoption.  
18  
19  
20  
21

## 22 **METHODS**

23  
24  
25 Ethics approval was received from IRB Services to survey a sample of Canadian physicians (oncologists,  
26  
27 cardiologists, and family physicians) regarding their knowledge, training and practice in genetic testing  
28  
29 and personalized medicine. Physician contact information was obtained from a 3<sup>rd</sup> party including  
30  
31 information for 859 oncologists and 1, 165 cardiologists from across Canada. A weighted sample,  
32  
33 based on population, of family physicians (n = 2,334) from Canadian provinces, was randomly selected  
34  
35 from contacts with email addresses. The self-administered survey was available in French and English  
36  
37 and distributed by mail, fax and email during the period May 26 to Sept 15, 2010. Respondents  
38  
39 submitted their responses online, by mail or by fax. Survey candidates were contacted with up to four  
40  
41 reminders to encourage participation. The survey questions were related to demographic information,  
42  
43 training, practice, knowledge and education in PM based on genetic testing, nature and extent of  
44  
45 practice in this area, and of the benefits of PM and barriers to its adoption.  
46  
47  
48  
49

50  
51 Vovici software (25) was used for the online survey administration, allowing for both open-ended and  
52  
53 close-ended questions, and menu creation for selection of pre-determined answer options for close-  
54  
55 ended questions. All questionnaires were reviewed for completeness. The data entry protocol  
56  
57  
58  
59  
60

1  
2  
3 included separate quality review of each survey against the entered data to ensure accuracy. Survey  
4  
5 results were analyzed using STATA software version 11.0 (26).  
6  
7

8  
9 This study was designed to be exploratory including analyses based on descriptive statistics and  
10  
11 bivariate associations. Inferential analyses were not pursued. Answers to survey questions were  
12  
13 compared according to medical specialty and region or province. Responses from the Atlantic  
14  
15 Provinces, Saskatchewan, Manitoba and Alberta were low relative to Ontario, Quebec and British  
16  
17 Columbia (BC). Data from the Atlantic Provinces (ATL), Nova Scotia, New Brunswick, Newfoundland  
18  
19 and Prince Edward Island, were combined and data from Saskatchewan, Manitoba and Alberta (WST)  
20  
21 were combined.  
22  
23

24  
25 Due to the small sample of responses for certain questions, results with more than a 5% probability of  
26  
27 occurring by chance were excluded. Pearson chi-squared test statistics were calculated to determine  
28  
29 whether differences according to medical specialty, region or province were statistically significant.  
30  
31

## 32 33 **RESULTS**

### 34 35 ***Respondent Profile***

36  
37 A total of 363 physicians provided responses to the survey (8.3% overall response rate). Physicians not  
38  
39 providing direct patient care (n=16) or not practicing in family medicine, cardiology or oncology (n=6)  
40  
41 were excluded. Thus, the respondent group retained for the analysis comprised 341 active physicians  
42  
43 with an adjusted response rate of 9.7%.  
44  
45

46  
47 Of the respondents, 43%, 30% and 27% were family physicians, cardiologists and oncologists,  
48  
49 respectively. Thirty-three percent of the respondents practiced in Ontario (ON), 20% in Quebec (QU),  
50  
51 24% in Manitoba, Saskatchewan and Alberta (WST), 14% in the Atlantic Provinces (ATL) and 9% in  
52  
53 British Columbia (BC). Of the cardiologist and oncologist respondents, 73% and 79%, respectively, held  
54  
55 academic appointments, compared to 41% of family physician respondents. One-third of survey  
56  
57  
58  
59  
60

1  
2  
3 respondents were in the 46-55 age range. The average time since completion of training for  
4 participating oncologists was 12 years, 18 years for cardiologists, and 22 years for family physicians.  
5  
6  
7  
8 Family physician respondents reported working predominately in offices or clinics, cardiologist  
9  
10 respondents predominantly in academic health science centres, community hospitals and private  
11  
12 office/clinic and oncologist respondents predominantly in academic health sciences centres.  
13  
14  
15 Respondents from all specialties were represented for each geographic area as shown in Figure 1.  
16  
17

### 18 ***Openness to Adoption***

19  
20 Respondents were asked a series of questions about their perceptions of the usefulness of genetic  
21  
22 testing in the context of PM, as an indicator of physicians' openness to the adoption of PM. The  
23  
24 majority of respondents agreed that knowing a patient's genetic profile can influence treatment  
25  
26 decision-making (83%) and importantly, can improve patient outcomes (70%). However, only 51% of  
27  
28 respondents agreed that there is sufficient evidence in support of ordering genetic tests. The  
29  
30 perception of the usefulness of genetic testing was similar across specialties and provinces as no  
31  
32 significant differences were observed (Figure 2).  
33  
34  
35

### 36 ***State of Practice***

37  
38 Respondents' current levels of practice and knowledge of genetic testing and PM were also assessed.  
39  
40 The results indicate that oncologist respondents are practicing more PM with 59% reporting having  
41  
42 ordered a genetic test in the past month compared to only 22% of general practitioners and  
43  
44 cardiologists. Oncologists also reported feeling more sufficiently informed, more able to interpret test  
45  
46 results and more comfortable discussing results with patients compared to other specialties (Figure 3).  
47  
48  
49 Overall only 21% of respondents agreed that they are sufficiently informed about PM and 29% agreed  
50  
51 that they are able to interpret the results of genetic tests. Thirty percent of respondents agreed that  
52  
53 they are comfortable discussing test results with patients. These measures appear to be consistent  
54  
55 across provinces (Figure 3). The survey also assessed physicians' perceptions of the impact of genetic  
56  
57  
58  
59  
60



1  
2  
3 testing on their patients. Of the respondents, 40% agreed that their patients have expressed fears of  
4  
5 discrimination based on genetic testing and 37% reported that their patients are asking them about  
6  
7 genetic testing and PM. Similar reports of patients expressing fear of discrimination were observed  
8  
9 across specialties (Figure 3); however, more oncologists (50%) reported that patients are asking about  
10  
11 PM compared to 30% of cardiologists and 32% general/family physicians (Figure 3).  
12  
13

#### 14 *Impacts and Benefits*

15  
16 Respondents were asked a series of questions about the impact and benefits of genetic testing in their  
17  
18 practice. Most respondents reported that genetic tests that they have ordered were for the purposes  
19  
20 of identifying a genetic predisposition or risk factor for disorders (60% agreed vs. 20% disagreed) and  
21  
22 that these tests influenced patient treatment plans (54% agreed vs. 18% disagreed). Many also  
23  
24 reported that genetic tests that they have ordered increased therapeutic benefit for patients (42%  
25  
26 agreed vs. 19% disagreed). Comparing across specialties (Figure 4, left panel), oncologist respondents  
27  
28 were more likely to agree that tests that they had ordered had influenced treatment plans (67%  
29  
30 agreed) compared to other specialties (Chi<sup>2</sup> P=0.006). Note that for the purpose of this study 'ordering'  
31  
32 means either requisitioning a test directly or facilitating access through another healthcare  
33  
34 professional, such as a medical geneticist or other specialist (56% of respondents reported that they  
35  
36 are responsible for ordering genetic tests for their patients and 31% reported that a geneticist is  
37  
38 responsible for ordering tests for their patients).  
39  
40  
41  
42  
43  
44

#### 45 *Barriers to Adoption*

46  
47 Respondents were asked to indicate what they perceive as the main barriers to their practice in genetic  
48  
49 testing and PM. A list of 13 barriers (Table 1) was provided. The top 5 cited barriers were: lack of  
50  
51 clinical practice guidelines, limited provider knowledge, attitudes and awareness of benefits, lack of  
52  
53 evidence-based clinical information, the cost of testing and a lack of time and resources to educate  
54  
55 patients.  
56  
57  
58  
59  
60

**Table 1:** Barriers to Adoption

| Barriers to physicians ordering genetic tests for PM | % of respondents who cited barrier as a 'main barrier' |
|------------------------------------------------------|--------------------------------------------------------|
| Lack of clinical guidelines                          | 60                                                     |
| Limited provider knowledge, awareness                | 57                                                     |
| Lack of evidence-based clinical information          | 53                                                     |
| Cost of tests is prohibitive                         | 48                                                     |
| Lack of time, resources to educate patients          | 37                                                     |
| Results take too long for a treatment decision       | 33                                                     |
| Too much paperwork/bureaucracy                       | 31                                                     |
| Lack of insurance coverage                           | 28                                                     |
| Insufficient regulatory framework                    | 27                                                     |
| Patient anxiety regarding test results               | 24                                                     |
| Lack of reimbursement                                | 19                                                     |
| Approval process takes too long                      | 14                                                     |
| Test results will not affect treatment               | 13                                                     |

### *Access to Testing*

With regards to access to appropriate genetic testing for their patients, 50% of respondents agreed that tests that they believe would be useful in their practice are not readily available, 48% indicated that the cost of genetic tests is a main barrier to the use of PM, and 33% indicated that the length of time it takes to obtain results is an important barrier to the use of PM, as the results may not be attained in adequate time to help make treatment decisions. Compared to other specialities, oncologists identified the time it takes to obtain results as a barrier to practice (59%) more often than other specialties (Figure 6). In general these measures relating to access to testing varied across provinces, possibly reflecting differences in access to genetic testing across Canada (Figure 6).

### *Physician Education*

Most respondents reported having no formal undergraduate (92%) or graduate training (89%) in genetic testing and PM. Interestingly, 73% of respondents have attended university lectures or

1  
2  
3 engaged in self-study and 75% would like more continuing education in this area. More oncologists  
4 reported having graduate training in this area (27%) compared to other specialties ( $\text{Chi}^2 P=0.0001$ ).  
5  
6  
7

## 8 9 **DISCUSSION**

### 10 11 ***Openness to Adoption***

12  
13 The results of this study indicate that Canadian physicians are optimistic about the promise of PM, and  
14 open to its adoption. The majority of respondents agreed that genetic testing as a component of PM  
15 can influence treatment plans (83%) and improve outcomes (70%). This is consistent with a recent  
16 survey of molecular oncology testing (MOT) in Ontario where it was reported that MOT is expected to  
17 become increasingly prevalent in all areas of diagnosis, prognosis, and treatment in the foreseeable  
18 future (21). Similar findings from another Canadian survey (27) and a study of 10,000+ physicians in  
19 the United States (28) also support widespread awareness among physicians of the current value and  
20 potential impact of PM. Positive perceptions among Canadian physicians may facilitate efficient and  
21 appropriate adoption of PM into practice.  
22  
23  
24  
25  
26  
27  
28  
29  
30  
31  
32  
33

34  
35 Patient engagement has been identified as a possible factor in physicians' attitudes toward adopting  
36 new practices (29, 30). Thirty-seven percent of respondents reported that patients are asking them  
37 about genetic testing and PM. Physicians also reported patients expressing fears of discrimination  
38 based on genetic testing (Figure 4). Although no existing Canadian legislation specifically prohibits  
39 genetic discrimination, a level of protection is provided through the Canadian Human Rights Act (Art. 3)  
40 and Canada's Personal Information Protection and Electronic Documents Act. Steps have been taken to  
41 strengthen these protections. In April of 2010, Bill C-508, an act to amend the Canadian Human Rights  
42 Act to specify genetic discrimination was introduced in parliament (31). Few respondents indicated  
43 that patient anxiety concerning test results is a barrier to their practice (Table 1). This is consistent  
44  
45  
46  
47  
48  
49  
50  
51  
52  
53  
54  
55  
56  
57  
58  
59  
60

1  
2  
3 with a recent US study of more than 2,000 individuals, which found no post-test anxiety or adverse  
4  
5 outcomes in individuals who received comprehensive genetic profiling (32).  
6  
7

### 8 9 ***State of Practice***

10  
11 This study showed that oncologists are practicing more in this area (Figures 3 and 4) and are leading the  
12  
13 in terms of adoption of PM among the specialties surveyed. In terms of access to testing, it was found  
14  
15 that this and other measures of the state of practice across the provinces varied (Figure 6). This  
16  
17 variability in practice and access across Canada may be due to differences in access to testing services,  
18  
19 funding, and the interpretation of the evidence or perception of benefits from province to province. It  
20  
21 has been suggested that decision-making related to predictive genetic testing is ad hoc and variable  
22  
23 across Canada and that a coordinated national approach is needed (33). Recommendations have been  
24  
25 proposed for a coordinated approach to the adoption and funding of genetic testing in Ontario (34).  
26  
27 Work in this area is critical to ensuring equitable access and improving parity of healthcare across  
28  
29 Canada. A coordinated strategy and implementation across the country may be challenging given the  
30  
31 disparate provincially funded and controlled health systems in Canada.  
32  
33  
34  
35  
36

### 37 38 ***Barriers to Adoption***

39  
40 A lack of medical guidelines was identified by respondents (61%) as the predominant barrier to  
41  
42 adoption, indicating a need for the development of best practices and guidelines to support the  
43  
44 implementation of PM. Sharing practices as well as genetic testing and pharmaco-economic  
45  
46 information across provincial healthcare systems is also likely necessary to support efficient and cost-  
47  
48 effective national implementation of PM.  
49  
50

51  
52 Of the respondents, 62% agreed that medical informatics will be critical to delivering PM. Indeed, vast  
53  
54 amounts of data will be generated with widespread adoption—and an IT infrastructure for collection,  
55  
56 storage, analysis, interpretation, and reporting will be needed (35-37). Furthermore decision support  
57  
58  
59  
60

1  
2  
3 tools, including electronic medical records (EMRs), will be needed to facilitate interpretation and point-  
4  
5 of-care decision-making. This may pose a significant barrier in Canada where IT infrastructure and EMR  
6  
7 implementation is targeted for completion only in 2015 (38) and lags significantly behind other OECD  
8  
9 nations.  
10

11  
12  
13 Surveys of Canadian (21, 22) and US physicians (28) have reported the need for physician education for  
14  
15 the successful adoption of PM. These studies found that a majority of physicians lack the education,  
16  
17 training, and support for successful adoption. The present study supports these findings. Furthermore  
18  
19 respondents indicated that they are actively pursuing more information with 73% engaging in self-  
20  
21 study. These data support a need for formal and continuing physician education in this area. A 2010  
22  
23 survey of 90 medical schools in the US and Canada found that 80% have begun to incorporate  
24  
25 pharmacogenomic training into their curriculum, however, approximately 60% considered this  
26  
27 instruction at their school to be 'poor' and more than 80% were not considering increasing the level of  
28  
29 instruction within the next 3 years (39).  
30  
31  
32  
33

34  
35 Physicians' perceptions and knowledge of the evidence supporting the clinical and analytical validity of  
36  
37 genetic tests for PM are obviously important for its adoption. Canadian and US studies have  
38  
39 demonstrated that current physician knowledge, real-world data and guidelines relating to PM has  
40  
41 often been insufficient for appropriate adoption (40); even where testing is recommended or publicly  
42  
43 funded (41, 42). In the present study, 51% of respondents agreed that there is sufficient evidence to  
44  
45 order genetic tests for PM. These results suggest either a need for better physician education or a  
46  
47 need for additional supporting evidence for personalized medicine implementation. Most likely both  
48  
49 factors are at play. Further supporting the need for more research was the finding that 53% of  
50  
51 respondents cited the need for evidence-based clinical information as a main barrier to their use of  
52  
53 genetic testing. Translational research is needed to provide more robust data for evaluating clinical  
54  
55  
56  
57  
58  
59  
60

1  
2  
3 utility and best practices for adoption and implementation within Canada's healthcare system.

4  
5 Furthermore, resources that provide physicians with easy access to accurate and current information  
6  
7  
8 would certainly facilitate appropriate and efficient adoption of PM going forward.  
9

### 10 **SURVEY LIMITATIONS**

11  
12 The response rate to the survey was low, and, as such, we must be careful when interpreting the  
13  
14 responses and generalizing the findings to the larger population. However, the response rates of other  
15  
16 similar physician surveys implemented in Canada have been comparable in recent years. Physicians are  
17  
18 asked to respond to many surveys to determine their knowledge, attitudes and practices regarding  
19  
20 many issues. As such, it is understandable if there is "survey fatigue". Physicians will be selective when  
21  
22 responding to surveys. Indeed the topic of this investigation is relatively new (particularly for family  
23  
24 physicians), and may be less relevant to most practitioners. In our follow-up discussions with some  
25  
26 physicians who participated in the survey, the opinion was offered that the subject of personalized  
27  
28 medicine is recent and will require more education, promotion and translation into practice before  
29  
30 physicians will have adequate understanding of and interest in responding to studies regarding this  
31  
32 issue. In this context, our survey results can be interpreted as more "qualitative" and as a benchmark  
33  
34 measure of family physician, oncologist and cardiologist knowledge, training and practice in  
35  
36 personalized medicine. Also, administration of the survey over the period May 26 to Sept 15, 2010 may  
37  
38 have negatively influenced the response rate. There may have been differences in respondents based  
39  
40 on the medium used to complete the survey (electronic vs. paper-based). The topic of genetic testing  
41  
42 and personalized medicine may not have been relevant to all physicians that were sent the survey,  
43  
44 which may have negatively affected the response rate. All survey results were based on physicians'  
45  
46 self-reports. The physician contact information was purchased through a 3rd party and some data  
47  
48 were incomplete or inaccurate.  
49  
50  
51  
52  
53  
54  
55  
56  
57  
58  
59  
60

## Conclusions

PM based on genetic testing is currently being practiced in Canada across specialties and provinces.

Many physicians recognize its benefits and are open to its adoption. Patients are asking their

physicians about genetic testing and PM; however, physicians are not confident in discussing genetic

testing and PM with their patients. This may not be surprising considering the overall lack of formal

education in the field as well as the limited time and resources available to physicians to do so. These

study results also indicate variability in practice and access across Canada. National strategies and

resources that facilitate healthcare provider knowledge, training, practice, and efficient adoption of

beneficial practices in PM are needed.

Soaring healthcare costs across industrialized countries are not sustainable. A few PM pioneers are

paving the way toward demonstrating that these new molecular tests can result in better care at lower

costs. Indeed, the history of innovation across many industries such as the computer,

telecommunications, higher education, transportation and many other sectors has shown that

previously inaccessible and expensive products and services can be transformed into accessible and

low-cost product and services through technology enablers such as personalized medicine and new

business models (43). Hence, if we strive for better healthcare, PM and the new models required for its

full implementation present an unavoidable challenge and opportunity to transform our healthcare

system into one adapted to the 21st century.

**ACKNOWLEDGEMENTS**

The authors wish to acknowledge Drs. Jean-Claude Tardif, Jean-Michel Turc, Charles Butts, and Simon Sutcliffe for their support in the survey's development and insights into the Canadian personalized medicine landscape, and the analytical support of Alex Kotsopolous, Natalia Lobach and Maureen Hazel.

**COMPETING INTERESTS**

None

**FUNDING STATEMENT**

This study was funded by the Centre of Excellence in Personalized Medicine, a federally funded Canadian Centre of Excellence in Commercialization and Research (CECR).



1  
2  
3  
4  
5  
6  
7  
8  
9  
10  
11  
12  
13  
14  
15  
16  
17  
18  
19  
20  
21  
22  
23  
24  
25  
26  
27  
28  
29  
30  
31  
32  
33  
34  
35  
36  
37  
38  
39  
40  
41  
42  
43  
44  
45  
46  
47  
48  
49  
50  
51  
52  
53  
54  
55  
56  
57  
58  
59  
60  
**REFERENCE LIST**

1. President's Council of Advisors on Science and Technology (PCAST) "Priorities for Personalized Medicine" September 2008.  
[http://www.whitehouse.gov/files/documents/ostp/PCAST/pcast\\_report\\_v2.pdf](http://www.whitehouse.gov/files/documents/ostp/PCAST/pcast_report_v2.pdf)
2. Hudson, Thomas J. 2009. Personalized medicine: a transformative approach is needed. CMAJ: Canadian Medical Association Journal = Journal De l'Association Medicale Canadienne 180, no. 9 (April 28): 911-913. doi:10.1503/cmaj.090199.
3. Collins, Francis. 2010. Has the revolution arrived? Nature 464, no. 7289 (April 1): 674-675. doi:10.1038/464674a.
4. Ku, Chee Seng, En Yun Loy, Agus Salim, Yudi Pawitan, and Kee Seng Chia. 2010. The discovery of human genetic variations and their use as disease markers: past, present and future. Journal of Human Genetics 55, no. 7 (July): 403-415. doi:10.1038/jhg.2010.55.
5. Manolio, Teri A, Lisa D Brooks, and Francis S Collins. 2008. A HapMap harvest of insights into the genetics of common disease. The Journal of Clinical Investigation 118, no. 5 (May): 1590-1605. doi:10.1172/JCI34772.
6. Ginsburg, Geoffrey S, and Huntington F Willard. 2009. Genomic and personalized medicine: foundations and applications. Translational Research: The Journal of Laboratory and Clinical Medicine 154, no. 6 (December): 277-287. doi:10.1016/j.trsl.2009.09.005.
7. Molecular Oncology Task Force Report, Ensuring Access to High Quality Molecular Oncology Laboratory Testing and Clinical Cancer Genetic Services in Ontario. Cancer Care Ontario. December 2008. <http://www.cancercare.on.ca/common/pages/UserFile.aspx?fileId=31935>
8. Hamburg, Margaret A, and Francis S Collins. 2010. The path to personalized medicine. The New England Journal of Medicine 363, no. 4 (July 22): 301-304. doi:10.1056/NEJMp1006304.
9. <http://www.pharmgkb.org/clinical/index.jsp>
10. Bates, Stewart. 2010. Progress towards personalized medicine. Drug Discovery Today 15, no. 3-4 (February): 115-120. doi:10.1016/j.drudis.2009.11.001.
11. Winkelmann, Bernhard R, and David Herrington. 2010. Pharmacogenomics--10 years of progress: a cardiovascular perspective. Pharmacogenomics 11, no. 5 (May): 613-616. doi:10.2217/pgs.10.68.

12. Blakey, John D, and Ian P Hall. 2011. Current Progress in Pharmacogenetics. *British Journal of Clinical Pharmacology* (January 14). doi:10.1111/j.1365-2125.2011.03912.x.  
<http://www.ncbi.nlm.nih.gov/pubmed/21235621>.
13. Diamandis, Maria, Nicole M A White, and George M Yousef. 2010. Personalized medicine: marking a new epoch in cancer patient management. *Molecular Cancer Research: MCR* 8, no. 9 (September): 1175-1187. doi:10.1158/1541-7786.MCR-10-0264.
14. Beijnen, Jos H, and Jan H M Schellens. 2010. Personalized medicine in oncology: a personal view with myths and facts. *Current Clinical Pharmacology* 5, no. 3 (August): 141-147. OR
15. Wright CF, Kroese M. Evaluation of genetic tests for susceptibility to common complex diseases: why, when and how? *Hum Genet.* 2010:127:125-134.
16. Knoppers, Bartha, and Policy Research Initiative (Canada). *Genomics, health and society: emerging issues for public policy.* [Ottawa]: Policy Research Initiative. 2004.  
[http://www.policyresearch.gc.ca/doclib/genomicbook\\_e.pdf](http://www.policyresearch.gc.ca/doclib/genomicbook_e.pdf)
17. Organisation for Economic Co-operation and Development (OECD) publication. *Pharmacogenetics : Opportunities and Challenges for Health Innovation.* Paris, November 2009,  
[http://www.oecd.org/document/6/0,3343,en\\_2649\\_34537\\_39405190\\_1\\_1\\_1\\_1,00.html](http://www.oecd.org/document/6/0,3343,en_2649_34537_39405190_1_1_1_1,00.html)
18. Davis, Jerel C, Laura Furstenthal, Amar A Desai, Troy Norris, Saumya Sutaria, Edd Fleming, and Philip Ma. 2009. The microeconomics of personalized medicine: today's challenge and tomorrow's promise. *Nature Reviews. Drug Discovery* 8, no. 4 (April): 279-286.  
doi:10.1038/nrd2825.
19. Allison, Malorye. 2008. Is personalized medicine finally arriving? *Nature Biotechnology* 26, no. 5 (May): 509-517. doi:10.1038/nbt0508-509.
20. Metcalfe, Kelly A, Isabel Fan, John McLaughlin, Harvey A Risch, Barry Rosen, Joan Murphy, Linda Bradley, Susan Armel, Ping Sun, and Steven A Narod. 2009. Uptake of clinical genetic testing for ovarian cancer in Ontario: a population-based study. *Gynecologic Oncology* 112, no. 1 (January): 68-72. doi:10.1016/j.ygyno.2008.10.007.
21. Miller, Fiona A, Paul Krueger, Robert J Christensen, Catherine Ahern, Ronald F Carter, and Suzanne Kamel-Reid. 2009. Postal survey of physicians and laboratories: practices and perceptions of molecular oncology testing. *BMC Health Services Research* 9: 131.  
doi:10.1186/1472-6963-9-131.
22. Miller, Fiona A, June C Carroll, Brenda J Wilson, Jessica P Bytautas, Judith Allanson, Mario Cappelli, Sonya de Laat, and Fred Saibil. 2010. The primary care physician role in cancer

- 1  
2  
3 genetics: a qualitative study of patient experience. *Family Practice* 27, no. 5 (October): 563-569.  
4 doi:10.1093/fampra/cm035.  
5  
6  
7 23. Adair, Alethea, Robyn Hyde-Lay, Edna Einsiedel, and Timothy Caulfield. 2009. Technology  
8 assessment and resource allocation for predictive genetic testing: A study of the perspectives  
9 of Canadian genetic health care providers. *BMC Medical Ethics* 10, no. 1: 6. doi:10.1186/1472-  
10 6939-10-6.  
11  
12 24. Little, J, B Potter, J Allanson, T Caulfield, J C Carroll, and B Wilson. 2009. Canada: public health  
13 genomics. *Public Health Genomics* 12, no. 2: 112-120. doi:10.1159/000156113.  
14  
15 25. Vovici Survey Software, <http://www.vovici.com/>  
16  
17 26. StataCorp. 2009. *Stata Statistical Software: Release 11*. College Station, TX: StataCorp LP.  
18  
19 27. Carroll, J C, M Cappelli, F Miller, B J Wilson, E Grunfeld, C Peeters, A G W Hunter, C Gilpin, and P  
20 Prakash. 2008. Genetic services for hereditary breast/ovarian and colorectal cancers -  
21 physicians' awareness, use and satisfaction. *Community Genetics* 11, no. 1: 43-51.  
22 doi:10.1159/000111639.  
23  
24 28. <https://www.medcoresearchinstitute.com/community/pharmacogenomics/physiciansurvey;jsessionid=14BFD8577F0BC0699643349A4B9F2FFA.node0>  
25  
26 29. Ohata, Takako, Atsushi Tsuchiya, Maiko Watanabe, Tomohisa Sumida, and Fumio Takada. 2009.  
27 Physicians' opinion for 'new' genetic testing in Japan. *Journal of Human Genetics* 54, no. 4  
28 (April): 203-208. doi:10.1038/jhg.2009.11.  
29  
30 30. Lamb, Neil E, Richard M Myers, and Chris Gunter. 2009. Education and personalized genomics:  
31 deciphering the public's genetic health report. *Personalized Medicine* 6, no. 6 (November 1):  
32 681. doi:10.2217/pme.09.57.  
33  
34 31. <http://www.ccgf-cceg.ca/sites/default/files/2010-04-14%20-%20Introduction%20of%20BillC-508%20-%20Genetic%20Discrimination.pdf>  
35  
36 32. Bloss, Cinnamon S, Nicholas J Schork, and Eric J Topol. 2011. Effect of direct-to-consumer  
37 genomewide profiling to assess disease risk. *The New England Journal of Medicine* 364, no. 6  
38 (February 10): 524-534. doi:10.1056/NEJMoa1011893.  
39  
40 33. Adair, Alethea, Robyn Hyde-Lay, Edna Einsiedel, and Timothy Caulfield. 2009. Technology  
41 assessment and resource allocation for predictive genetic testing: A study of the perspectives  
42 of Canadian genetic health care providers. *BMC Medical Ethics* 10, no. 1: 6. doi:10.1186/1472-  
43 6939-10-6.  
44  
45  
46  
47  
48  
49  
50  
51  
52  
53  
54  
55  
56  
57  
58  
59  
60

- 1  
2  
3  
4  
5  
6  
7  
8  
9  
10  
11  
12  
13  
14  
15  
16  
17  
18  
19  
20  
21  
22  
23  
24  
25  
26  
27  
28  
29  
30  
31  
32  
33  
34  
35  
36  
37  
38  
39  
40  
41  
42  
43  
44  
45  
46  
47  
48  
49  
50  
51  
52  
53  
54  
55  
56  
57  
58  
59  
60
34. Ontario Genetics Secretariat. 2009. Genetic Testing, Services and Research, Contributing to the Future Health of Ontarians. White Paper. February 26.
  35. Fackler, Jennifer L, and Amy L McGuire. 2009. Paving the Way to Personalized Genomic Medicine: Steps to Successful Implementation. *Current Pharmacogenomics and Personalized Medicine* 7, no. 2 (June 1): 125-132. doi:10.2174/187569209788653998.
  36. Kawamoto, Kensaku, David F Lobach, Huntington F Willard, and Geoffrey S Ginsburg. 2009. A national clinical decision support infrastructure to enable the widespread and consistent practice of genomic and personalized medicine. *BMC Medical Informatics and Decision Making* 9: 17. doi:10.1186/1472-6947-9-17.
  37. Downing, Gregory J. 2009. Key aspects of health system change on the path to personalized medicine. *Translational Research: The Journal of Laboratory and Clinical Medicine* 154, no. 6 (December): 272-276. doi:10.1016/j.trsl.2009.09.003.
  38. [https://www.infoway-inforoute.ca/flash/lang-en/ar2009-2010/docs/CHI\\_AnnualReport\\_2009-2010\\_ENG.pdf](https://www.infoway-inforoute.ca/flash/lang-en/ar2009-2010/docs/CHI_AnnualReport_2009-2010_ENG.pdf)
  39. Green, James S, Travis J O'Brien, Vincent A Chiappinelli, and Arthur F Harralson. 2010. Pharmacogenomics instruction in US and Canadian medical schools: implications for personalized medicine. *Pharmacogenomics* 11, no. 9 (September): 1331-1340. doi:10.2217/pgs.10.122.
  40. Bellcross, Cecelia A, Katherine Kolor, Katrina A B Goddard, Ralph J Coates, Michele Reyes, and Muin J Khoury. 2011. Awareness and utilization of BRCA1/2 testing among U.S. primary care physicians. *American Journal of Preventive Medicine* 40, no. 1 (January): 61-66. doi:10.1016/j.amepre.2010.09.027.
  41. Wu, A C, and A L Fuhlbrigge. 2008. Economic evaluation of pharmacogenetic tests. *Clinical Pharmacology and Therapeutics* 84, no. 2 (August): 272-274. doi:10.1038/clpt.2008.127.
  42. Phillips, Kathryn A, Deborah A Marshall, Jennifer S Haas, Elena B Elkin, Su-Ying Liang, Michael J Hassett, Ilia Ferrusi, Jane E Brock, and Stephanie L Van Bebber. 2009. Clinical practice patterns and cost effectiveness of human epidermal growth receptor 2 testing strategies in breast cancer patients. *Cancer* 115, no. 22 (November 15): 5166-5174. doi:10.1002/cncr.24574.
  43. Christensen, Clayton. 2009. *The innovator's prescription: a disruptive solution for health care*. New York: McGraw-Hill.

1  
2  
3  
4  
5  
6  
7  
8  
9  
10  
11  
12  
13  
14  
15  
16  
17  
18  
19  
20  
21  
22  
23  
24  
25  
26  
27  
28  
29  
30  
31  
32  
33  
34  
35  
36  
37  
38  
39  
40  
41  
42  
43  
44  
45  
46  
47  
48  
49  
50  
51  
52  
53  
54  
55  
56  
57  
58  
59  
60

For peer review only

STROBE 2007 (v4) Statement—Checklist of items that should be included in reports of cross-sectional studies

| Section/Topic             | Item # | Recommendation                                                                                                                                                                       | Reported on page # |
|---------------------------|--------|--------------------------------------------------------------------------------------------------------------------------------------------------------------------------------------|--------------------|
| Title and abstract        | 1      | (a) Indicate the study’s design with a commonly used term in the title or the abstract                                                                                               | 1                  |
|                           |        | (b) Provide in the abstract an informative and balanced summary of what was done and what was found                                                                                  | 2                  |
| <b>Introduction</b>       |        |                                                                                                                                                                                      |                    |
| Background/rationale      | 2      | Explain the scientific background and rationale for the investigation being reported                                                                                                 | 4                  |
| Objectives                | 3      | State specific objectives, including any prespecified hypotheses                                                                                                                     | 5                  |
| <b>Methods</b>            |        |                                                                                                                                                                                      |                    |
| Study design              | 4      | Present key elements of study design early in the paper                                                                                                                              | 5                  |
| Setting                   | 5      | Describe the setting, locations, and relevant dates, including periods of recruitment, exposure, follow-up, and data collection                                                      | 5                  |
| Participants              | 6      | (a) Give the eligibility criteria, and the sources and methods of selection of participants                                                                                          | 5                  |
| Variables                 | 7      | Clearly define all outcomes, exposures, predictors, potential confounders, and effect modifiers. Give diagnostic criteria, if applicable                                             | 6                  |
| Data sources/ measurement | 8*     | For each variable of interest, give sources of data and details of methods of assessment (measurement). Describe comparability of assessment methods if there is more than one group | 5                  |
| Bias                      | 9      | Describe any efforts to address potential sources of bias                                                                                                                            | 6                  |
| Study size                | 10     | Explain how the study size was arrived at                                                                                                                                            | 6                  |
| Quantitative variables    | 11     | Explain how quantitative variables were handled in the analyses. If applicable, describe which groupings were chosen and why                                                         | 6                  |
| Statistical methods       | 12     | (a) Describe all statistical methods, including those used to control for confounding                                                                                                | 6                  |
|                           |        | (b) Describe any methods used to examine subgroups and interactions                                                                                                                  | 6                  |
|                           |        | (c) Explain how missing data were addressed                                                                                                                                          | 6                  |
|                           |        | (d) If applicable, describe analytical methods taking account of sampling strategy                                                                                                   | 6                  |
|                           |        | (e) Describe any sensitivity analyses                                                                                                                                                | 6                  |
| <b>Results</b>            |        |                                                                                                                                                                                      |                    |

|                          |     |                                                                                                                                                                                                              |         |
|--------------------------|-----|--------------------------------------------------------------------------------------------------------------------------------------------------------------------------------------------------------------|---------|
| Participants             | 13* | (a) Report numbers of individuals at each stage of study—eg numbers potentially eligible, examined for eligibility, confirmed eligible, included in the study, completing follow-up, and analysed            | 6       |
|                          |     | (b) Give reasons for non-participation at each stage                                                                                                                                                         | 6       |
|                          |     | (c) Consider use of a flow diagram                                                                                                                                                                           |         |
| Descriptive data         | 14* | (a) Give characteristics of study participants (eg demographic, clinical, social) and information on exposures and potential confounders                                                                     | 6       |
|                          |     | (b) Indicate number of participants with missing data for each variable of interest                                                                                                                          | 6       |
| Outcome data             | 15* | Report numbers of outcome events or summary measures                                                                                                                                                         | N/A     |
| Main results             | 16  | (a) Give unadjusted estimates and, if applicable, confounder-adjusted estimates and their precision (eg, 95% confidence interval). Make clear which confounders were adjusted for and why they were included | 6 - 9   |
|                          |     | (b) Report category boundaries when continuous variables were categorized                                                                                                                                    | 6 - 9   |
|                          |     | (c) If relevant, consider translating estimates of relative risk into absolute risk for a meaningful time period                                                                                             | N/A     |
| Other analyses           | 17  | Report other analyses done—eg analyses of subgroups and interactions, and sensitivity analyses                                                                                                               | 6 - 9   |
| <b>Discussion</b>        |     |                                                                                                                                                                                                              |         |
| Key results              | 18  | Summarise key results with reference to study objectives                                                                                                                                                     | 9       |
| Limitations              | 19  | Discuss limitations of the study, taking into account sources of potential bias or imprecision. Discuss both direction and magnitude of any potential bias                                                   | 14      |
| Interpretation           | 20  | Give a cautious overall interpretation of results considering objectives, limitations, multiplicity of analyses, results from similar studies, and other relevant evidence                                   | 9 - 13  |
| Generalisability         | 21  | Discuss the generalisability (external validity) of the study results                                                                                                                                        | 12 - 13 |
| <b>Other information</b> |     |                                                                                                                                                                                                              |         |
| Funding                  | 22  | Give the source of funding and the role of the funders for the present study and, if applicable, for the original study on which the present article is based                                                | 14      |

\*Give information separately for cases and controls in case-control studies and, if applicable, for exposed and unexposed groups in cohort and cross-sectional studies.

**Note:** An Explanation and Elaboration article discusses each checklist item and gives methodological background and published examples of transparent reporting. The STROBE checklist is best used in conjunction with this article (freely available on the Web sites of PLoS Medicine at <http://www.plosmedicine.org/>, Annals of Internal Medicine at <http://www.annals.org/>, and Epidemiology at <http://www.epidem.com/>). Information on the STROBE Initiative is available at [www.strobe-statement.org](http://www.strobe-statement.org).

1  
2  
3  
4  
5  
6  
7  
8  
9  
10  
11  
12  
13  
14  
15  
16  
17  
18  
19  
20  
21  
22  
23  
24  
25  
26  
27  
28  
29  
30  
31  
32  
33  
34  
35  
36  
37  
38  
39  
40  
41  
42  
43  
44  
45  
46  
47  
48  
49  
50  
51  
52  
53  
54  
55  
56  
57  
58  
59  
60

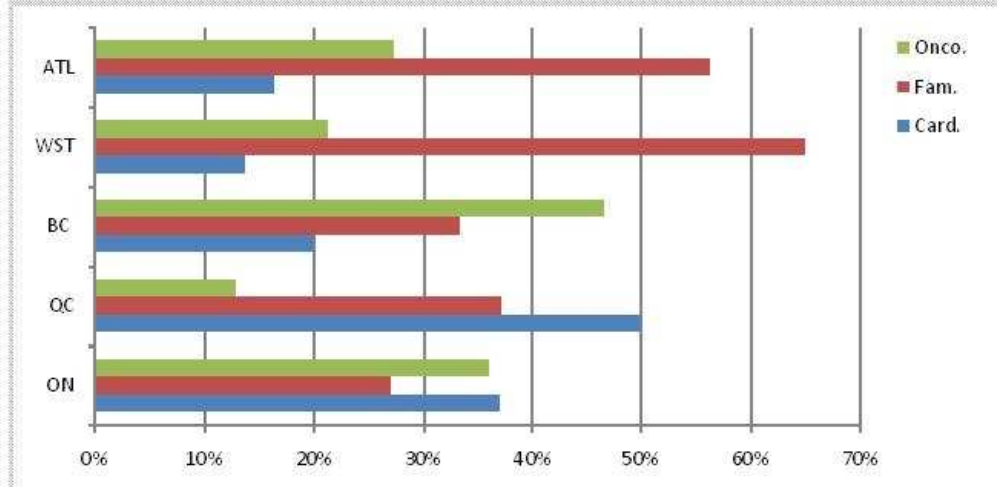

**Figure 1:** Distribution of respondents by specialty (panel A); family medicine (Fam.), Cardiology (Card.) and oncology (Onco.) and by geography (panel B); Ontario (ON), Quebec (QC), British Columbia (BC), Western Provinces (WST) and Atlantic Provinces (ALT).

172x135mm (96 x 96 DPI)

ew only



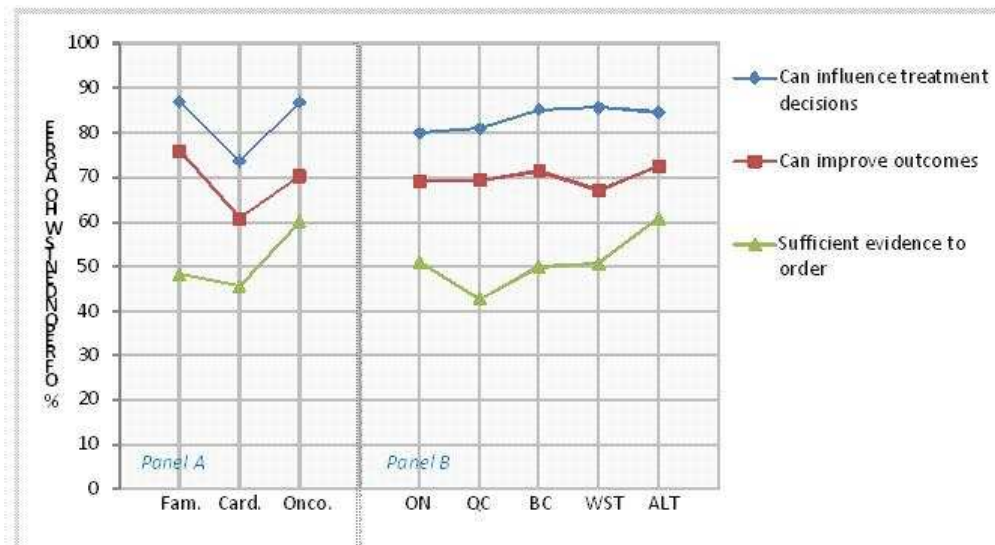

**Figure 2:** Respondents' perceptions of utility by specialty (panel A): family medicine (Fam.), Cardiology (Card.) and oncology (Onco.) and by geography (panel B): Ontario (ON), Quebec (QC), British Columbia (BC), Western Provinces (WST) and Atlantic Provinces (ALT).

176x135mm (96 x 96 DPI)

Review only

1  
2  
3  
4  
5  
6  
7  
8  
9  
10  
11  
12  
13  
14  
15  
16  
17  
18  
19  
20  
21  
22  
23  
24  
25  
26  
27  
28  
29  
30  
31  
32  
33  
34  
35  
36  
37  
38  
39  
40  
41  
42  
43  
44  
45  
46  
47  
48  
49  
50  
51  
52  
53  
54  
55  
56  
57  
58  
59  
60

1  
2  
3  
4  
5  
6  
7  
8  
9  
10  
11  
12  
13  
14  
15  
16  
17  
18  
19  
20  
21  
22  
23  
24  
25  
26  
27  
28  
29  
30  
31  
32  
33  
34  
35  
36  
37  
38  
39  
40  
41  
42  
43  
44  
45  
46  
47  
48  
49  
50  
51  
52  
53  
54  
55  
56  
57  
58  
59  
60

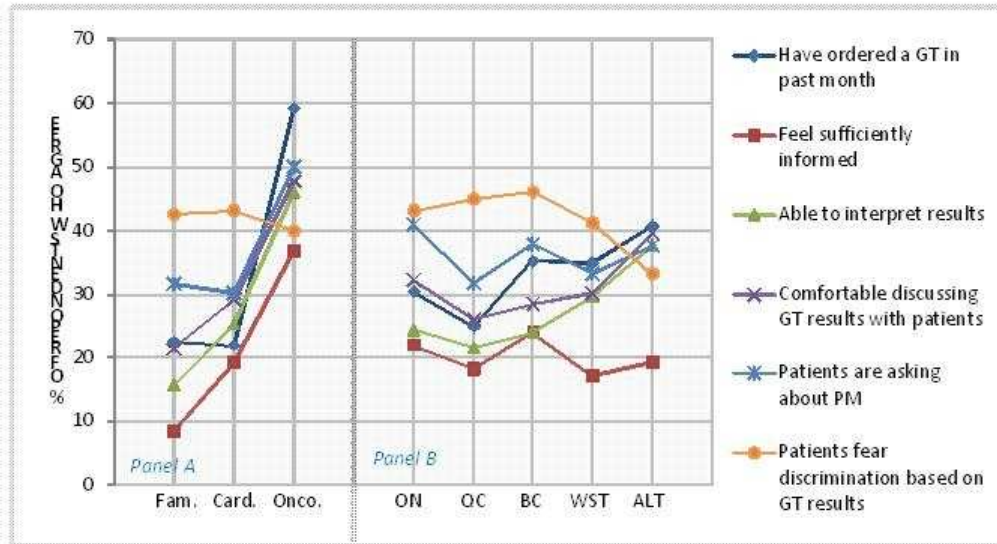

**Figure 3:** Measures of state of practice by specialty (panel A); family medicine (Fam.), Cardiology (Card.) and oncology (Onco.) and by geography (panel B); Ontario (ON), Quebec (QC), British Columbia (BC), Western Provinces (WST) and Atlantic Provinces (ALT).

176x135mm (96 x 96 DPI)

Review only

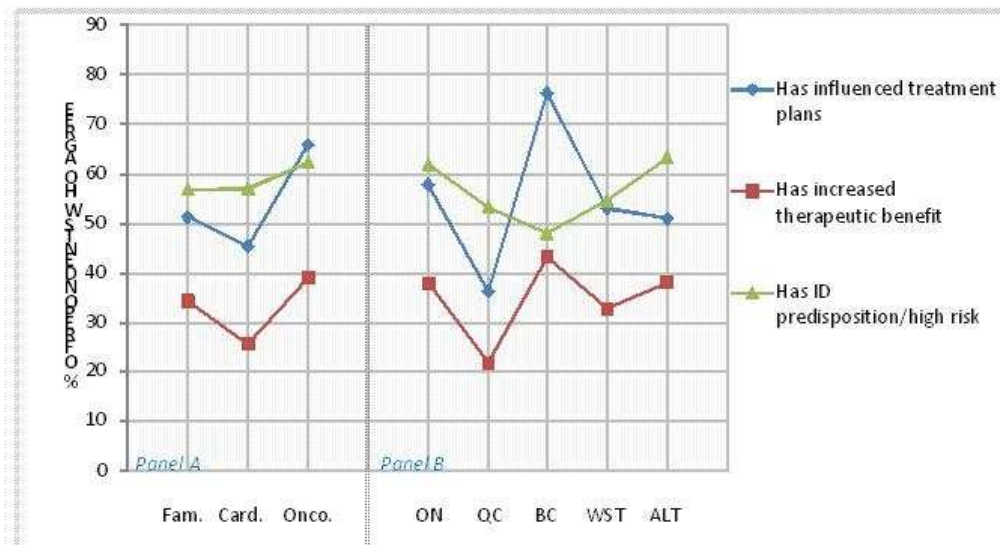

**Figure 4:** Comparison of reported impacts and benefits by specialty (panel A); family medicine (Fam.), Cardiology (Card.) and oncology (Onco.) and by geography (panel B); Ontario (ON), Quebec (QC), British Columbia (BC), Western Provinces (WST) and Atlantic Provinces (ALT).

176x135mm (96 x 96 DPI)

View only

1  
2  
3  
4  
5  
6  
7  
8  
9  
10  
11  
12  
13  
14  
15  
16  
17  
18  
19  
20  
21  
22  
23  
24  
25  
26  
27  
28  
29  
30  
31  
32  
33  
34  
35  
36  
37  
38  
39  
40  
41  
42  
43  
44  
45  
46  
47  
48  
49  
50  
51  
52  
53  
54  
55  
56  
57  
58  
59  
60

1  
2  
3  
4  
5  
6  
7  
8  
9  
10  
11  
12  
13  
14  
15  
16  
17  
18  
19  
20  
21  
22  
23  
24  
25  
26  
27  
28  
29  
30  
31  
32  
33  
34  
35  
36  
37  
38  
39  
40  
41  
42  
43  
44  
45  
46  
47  
48  
49  
50  
51  
52  
53  
54  
55  
56  
57  
58  
59  
60

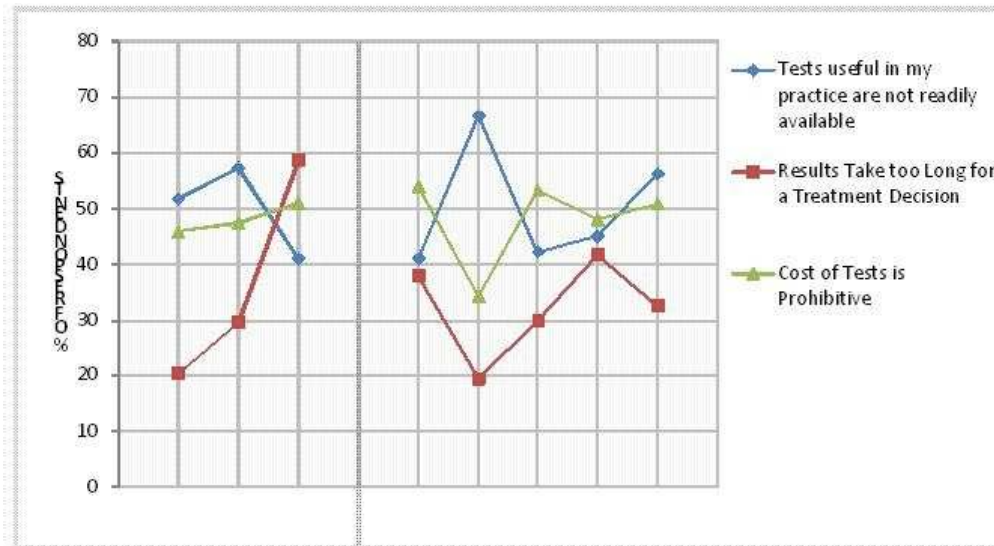

**Figure 5:** Measures of barriers to access by specialty (panel A); family medicine (Fam.), Cardiology (Card.) and oncology (Onco.) and by geography (panel B); Ontario (ON), Quebec (QC), British Columbia (BC), Western Provinces (WST) and Atlantic Provinces (ALT).

176x135mm (96 x 96 DPI)

Review only

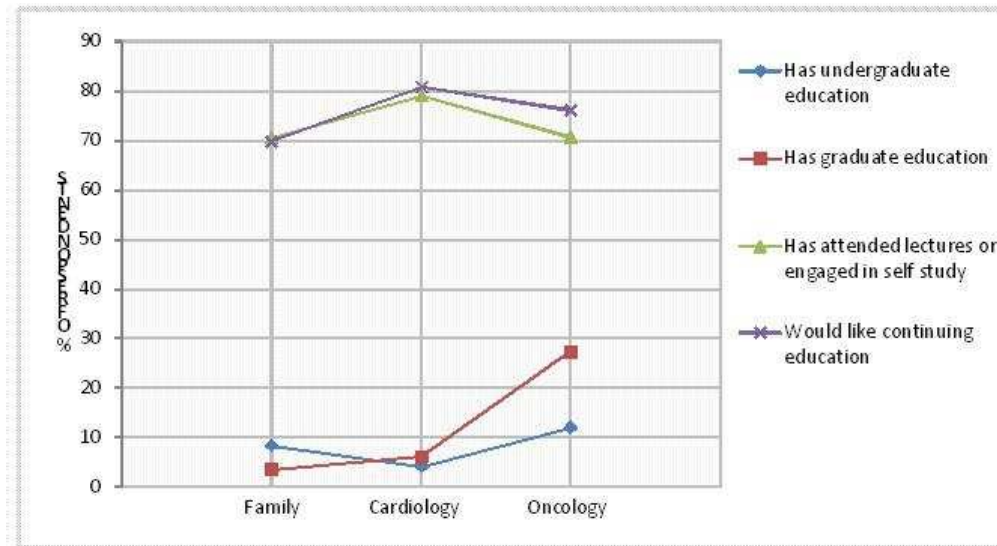

Figure 6: Measures of physician education in genetic testing and PM by specialty.

176x135mm (96 x 96 DPI)

Review only

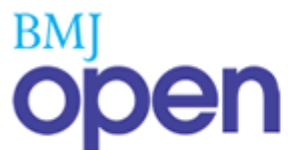

**Personalized Medicine in Canada: A Survey of Adoption and Practice in Oncology, Cardiology and Family Medicine**

|                               |                                                                                                                                                                                                                                                                                                    |
|-------------------------------|----------------------------------------------------------------------------------------------------------------------------------------------------------------------------------------------------------------------------------------------------------------------------------------------------|
| Journal:                      | <i>BMJ Open</i>                                                                                                                                                                                                                                                                                    |
| Manuscript ID:                | bmjopen-2011-000110.R1                                                                                                                                                                                                                                                                             |
| Article Type:                 | Research                                                                                                                                                                                                                                                                                           |
| Date Submitted by the Author: | 05-Apr-2011                                                                                                                                                                                                                                                                                        |
| Complete List of Authors:     | Bonter, Katherine; Centre of Excellence in Personalized Medicine<br>Desjardins, Clarissa; Centre of Excellence in Personalized Medicine<br>Currier, Nathan; Centre of Excellence in Personalized Medicine<br>Pun, Jason; PricewaterhouseCoopers LLP<br>Ashbury, Fredrick; PICEPS Consultants, Inc. |
| <b>Subject Heading</b>:       | Genetics                                                                                                                                                                                                                                                                                           |
| Keywords:                     | physician practice, personalized medicine, genetic testing, physician behaviour, risk assessment, survey                                                                                                                                                                                           |
|                               |                                                                                                                                                                                                                                                                                                    |

SCHOLARONE™  
Manuscripts

Peer Review Only

1  
2  
3  
4  
5  
6  
7  
8  
9  
10  
11  
12  
13  
14  
15  
16  
17  
18  
19  
20  
21  
22  
23  
24  
25  
26  
27  
28  
29  
30  
31  
32  
33  
34  
35  
36  
37  
38  
39  
40  
41  
42  
43  
44  
45  
46  
47  
48  
49  
50  
51  
52  
53  
54  
55  
56  
57  
58  
59  
60

**Personalized Medicine in Canada: A Survey of Adoption and Practice in Oncology, Cardiology and Family Medicine**

Corresponding Author: Dr. Clarissa Desjardins, 5000 rue Belanger Est

Montréal, Québec, H1T 1C8, tel.514-670-7660; email: [cdesjardins@cepmed.com](mailto:cdesjardins@cepmed.com)

Bonter, Katherine MSc<sup>1</sup>, Desjardins, Clarissa PhD<sup>1</sup>, Currier, Nathan PhD<sup>1</sup>, Pun, Jason MSc MBA<sup>2</sup>,  
Ashbury, Fredrick PhD<sup>2,3,4</sup>

1 Centre of Excellence in Personalized Medicine (Cepmed), Montreal, Québec, Canada

2 PricewaterhouseCoopers LLP, Toronto, Ontario, Canada

3 Division of Preventive Oncology, Department of Oncology, University of Calgary, Calgary, Alberta Canada

4 Dalla Lana School of Public Health, University of Toronto, Toronto, Ontario, Canada

Formatted: Bullets and Numbering

Keywords: personalized medicine, genetic testing, survey, physician behaviour, risk assessment

Word count: 2,926

**ABSTRACT**

In order to provide baseline data relating to genetic testing as a key element of personalized medicine (PM), Canadian physicians were surveyed to understand roles, perceptions and experiences in this area. The survey measured attitudes, practice, observed benefits and impacts, and barriers to adoption.

**Deleted:** genetic testing and personalized medicine (PM)  
**Deleted:** )  
**Deleted:** openness to adoption  
**Deleted:** ,

A self-administered survey was provided to Canadian oncologists, cardiologists and family physicians and responses were obtained online, by mail or by fax. The survey was designed to be exploratory. Comparisons of data were made across specialties and geography.

An overall response rate of 8.3% was obtained. Of the respondents, 43%, 30% and 27% were family physicians, cardiologists or oncologists respectively. A strong majority of respondents agreed that genetic testing and PM can have a positive impact on their practice however only 51% agreed that there is sufficient evidence to order such tests. A low percentage of respondents feel that they are sufficiently informed and confident practicing in this area, however many reported that genetic tests they have ordered have benefited their patients. Half of the respondents agreed that genetic tests that would be useful in their practice are not readily available. A lack of practice guidelines, limited provider knowledge and lack of evidence-based clinical information were cited as the main barriers to practice. Differences across provinces were observed for measures relating to access to testing and the state of practice. Differences across specialties were observed for the state of practice, reported benefits and access to testing.

Canadian physicians recognize the benefits of genetic testing and PM; however they lack the education, information and support needed to practice effectively in this area. Variability in practice and access to testing across specialties and across Canada was observed. These results support a need for national strategies and resources to facilitate physician knowledge, training and practice in PM.

**Deleted:** and are open to its adoption

**ARTICLE SUMMARY**

**Article Focus:**

- Canadian physicians’ perceptions and experience relating to genetic testing and personalized medicine (PM)
- Practice and impact of genetic testing and PM in Canada and across specialties
- Implications for continued adoption of genetic testing and PM in Canada across specialties

**Key Messages:**



- 1
- 2
- 3
- 4
- 5
- 6
- 7
- 8
- 9
- 10
- 11
- 12
- 13
- 14
- 15
- 16
- 17
- 18
- 19
- 20
- 21
- 22
- 23
- 24
- 25
- 26
- 27
- 28
- 29
- 30
- 31
- 32
- 33
- 34
- 35
- 36
- 37
- 38
- 39
- 40
- 41
- 42
- 43
- 44
- 45
- 46
- 47
- 48
- 49
- 50
- 51
- 52
- 53
- 54
- 55
- 56
- 57
- 58
- 59
- 60
- Family physicians, cardiologists and oncologists across Canada are practicing personalized medicine and recognize its benefits and potential impacts
- Physicians reported a number of barriers to the adoption of PM that are currently affecting medical practice in Canada
- The practice of and access to genetic testing and personalized medicine varies both across specialties and provinces that will have an impact on continued adoption in this area

#### **AUTHORS' CONTRIBUTIONS**

All authors were involved in the design of the survey, interpretation of results and drafting the article.

In addition, Pun and Ashbury were involved in the implementation, data collection, and analysis. Three co-authors (Desjardins, Bonter and Currier) are employed by Cepmed. Pun and Ashbury were employed by PricewaterhouseCoopers LLP, and were commissioned by Cepmed to lead the survey project.

## INTRODUCTION

*“for the sweet ones [treatments] do not benefit everyone, nor do the astringent ones, nor are all the patients able to drink the same things”*  
*(Hippocrates)*

Personalized medicine (PM), the tailoring of medical treatment or prevention to the individual characteristics of each patient, has been enabled by recent advances in molecular biology (1). Research in the ‘-omic’ sciences has resulted in improved understanding of the relationships between genes, proteins and disease, providing more tools for PM (2-5) and driving a shift in medical practice (6). Evidence of this ‘shift’ include a 66% increase in cancer-related genetic testing in Ontario between 2002 and 2008 (7), the fact that 10% of FDA approved drugs include pharmacogenomic information on their labels (8), and that genetic testing is recommended or required for at least 11 FDA approved drugs (9) and for 10 Health Canada approved drugs (based on a review of drug labeling using the Health Canada Drug Product Database). A number of applications of PM based on genetic testing are currently in use (10). Pharmacogenomics, the optimization of drug therapy based on genetic information, has been applied to improve clinical outcomes or reduce side effects and adverse events (11, 12). Targeted therapeutics, used in combination with companion diagnostics has been particularly successful in improving the treatment of cancer (13, 14). Finally, PM is being used to assess disease risk, facilitating prevention and early detection (15).

As a result of these developments PM has become an increasingly important topic for physicians, healthcare organizations and the public (16-17). There is widespread debate as to the intended and unintended consequences of PM on the quality and cost of healthcare, however many scientific and medical leaders expect PM to increase the quality of healthcare and reduce overall healthcare costs (13,18,19). A few studies have assessed the adoption of genetic testing and its impact on the role and practice of physicians in Canada (20-24). These studies focused primarily on the adoption of genetic

Formatted: Indent: Left: 0 pt

Deleted: ¶

Formatted: Font color: Black, English (U.S.)

tests for diagnosis and treatment of cancer within Ontario's healthcare system, as well as the needs and recommendations for physician education, public education and improved coordination of healthcare delivery and genetic testing services. In order to facilitate medical and continuing professional education in personalized medicine in Canada, it is essential to have a baseline understanding of current knowledge, attitudes, and practices.

**Formatted:** Font color: Black, English (U.S.)

**Formatted:** Font color: Black, English (U.S.)

**Formatted:** Font color: Black, English (U.S.)

The present pan-Canadian survey of practicing oncologists, cardiologists and family doctors was designed to provide baseline data relating to genetic testing as a key element of PM in Canada with respect to attitudes, state of practice, and barriers to adoption. There were three specialties chosen as the target audience for the survey: cardiologists and oncologists were chosen as they will experience higher volumes and needs for personalized genetic testing while family physicians are usually the first point of contact for patients, and are often involved with screening for risk of disease.

**Deleted:**

**Deleted:** openness to adoption

## METHODS

Ethics approval was received from IRB Services to survey a sample of Canadian physicians (oncologists, cardiologists, and family physicians) regarding their knowledge, training and practice in genetic testing and personalized medicine.

**Formatted:** English (Canada)

Physician contact information was obtained from a 3rd party including information for 859 oncologists and 1,165 cardiologists from across Canada. A weighted sample, based on population, of family physicians (n = 2,334) from Canadian provinces, was randomly selected from contacts with email addresses. The self-administered survey was available in French and English and distributed by mail, fax and email during the period May 26 to Sept 15, 2010. Respondents submitted their responses online, by mail or by fax. Survey candidates were contacted with up to four reminders to encourage participation. The survey questions were related to demographic information, training, practice, knowledge and education in PM based on genetic testing, nature and extent of practice in this area, and of the benefits of PM and barriers to its adoption. Questions were developed based on the authors' knowledge of genetic testing and PM. A draft of the survey questions was developed from this knowledge base and a review of the literature of previous surveys conducted in other jurisdictions (28, 29). This draft survey was subsequently reviewed by 11 physicians (5 oncologists, 3 cardiologists, 3 family physicians) and their feedback was incorporated into the final survey. The survey's design was

**Deleted:**

**Formatted:** English (Canada)

**Formatted:** Don't adjust right indent when grid is defined, Space After: 0 pt, Line spacing: 1.5 lines, Don't adjust space between Latin and Asian text, Don't adjust space between Asian text and numbers

1  
2 informed by thinking about how new technologies or innovations are adopted in practice and a  
3 diffusion of innovations framework was considered (44). The survey solicited physicians' knowledge of,  
4 attitudes, and practice of personalized genetic testing to understand the relative advantage,  
5 compatibility, ease of implementation, and system response to understand adoption of personalized  
6 genetic testing. This is an initial application of this framework to the Canadian context.  
7  
8 Deleted: ¶

9 Vovici software (25) was used for the online survey administration, allowing for both open-ended and  
10 close-ended questions, and menu creation for selection of pre-determined answer options for close-  
11 ended questions. All questionnaires were reviewed for completeness. The data entry protocol  
12 included separate quality review of each survey against the entered data to ensure accuracy. Survey  
13 results were analyzed using STATA software version 11.0 (26).  
14

15 This study was designed to be exploratory including analyses based on descriptive statistics and  
16 bivariate associations. Inferential analyses were not pursued. Answers to survey questions were  
17 compared according to medical specialty and region or province. Responses from the Atlantic  
18 Provinces, Saskatchewan, Manitoba and Alberta were low relative to Ontario, Quebec and British  
19 Columbia (BC). Data from the Atlantic Provinces (ATL), Nova Scotia, New Brunswick, Newfoundland  
20 and Prince Edward Island, were combined and data from Saskatchewan, Manitoba and Alberta (WST)  
21 were combined.  
22

23 Due to the small sample of responses for certain questions, results with more than a 5% probability of  
24 occurring by chance were excluded. Pearson chi-squared test statistics were calculated to determine  
25 whether differences according to medical specialty, region or province were statistically significant.  
26

## 27 RESULTS

### 28 *Respondent Profile*

29 A total of 363 physicians provided responses to the survey (8.3% overall response rate). Physicians not  
30 providing direct patient care (n=16) or not practicing in family medicine, cardiology or oncology (n=6)  
31  
32

1  
2 were excluded. Thus, the respondent group retained for the analysis comprised 341 active physicians  
3  
4 with an adjusted response rate of 9.7%.

5  
6 Of the respondents, 43%, 30% and 27% were family physicians, cardiologists and oncologists,  
7  
8 respectively. Thirty-three percent of the respondents practiced in Ontario (ON), 20% in Quebec (QU),  
9  
10 24% in Manitoba, Saskatchewan and Alberta (WST), 14% in the Atlantic Provinces (ATL) and 9% in  
11  
12 British Columbia (BC). Of the cardiologist and oncologist respondents, 73% and 79%, respectively, held  
13  
14 academic appointments, compared to 41% of family physician respondents. One-third of survey  
15  
16 respondents were in the 46-55 age range. The average time since completion of training for  
17  
18 participating oncologists was 12 years, 18 years for cardiologists, and 22 years for family physicians.  
19  
20 Family physician respondents reported working predominately in offices or clinics, cardiologist  
21  
22 respondents predominantly in academic health science centres, community hospitals and private  
23  
24 office/clinic and oncologist respondents predominantly in academic health sciences centres.  
25  
26 Respondents from all specialties were represented for each geographic area as shown in Figure 1.

### 27 28 Attitudes and Perceptions

29  
30 Respondents were asked a series of questions about their attitudes and perceptions of the usefulness  
31  
32 of genetic testing in the context of PM, as an indicator of physicians' openness to the adoption of PM.  
33  
34 The majority of respondents agreed that knowing a patient's genetic profile can influence treatment  
35  
36 decision-making (83%) and importantly, can improve patient outcomes (70%). However, only 51% of  
37  
38 respondents agreed that there is sufficient evidence in support of ordering genetic tests. The  
39  
40 perception of the usefulness of genetic testing was similar across specialties and provinces as no  
41  
42 significant differences were observed (Figure 2).

### 43 **State of Practice**

Deleted: Openness to Adoption

1 Respondents' current levels of practice and knowledge of genetic testing and PM were also assessed.  
2  
3  
4 The results indicate that oncologist respondents are practicing more PM with 59% reporting having  
5  
6 ordered a genetic test in the past month compared to only 22% of general practitioners and  
7  
8 cardiologists. Oncologists also reported feeling more sufficiently informed, more able to interpret test  
9  
10 results and more comfortable discussing results with patients compared to other specialties (Figure 3).  
11  
12 Overall only 21% of respondents agreed that they are sufficiently informed about PM and 29% agreed  
13  
14 that they are able to interpret the results of genetic tests. Thirty percent of respondents agreed that  
15  
16 they are comfortable discussing test results with patients. These measures appear to be consistent  
17  
18 across provinces (Figure 3). The survey also assessed physicians' perceptions of the impact of genetic  
19  
20 testing on their patients. Of the respondents, 40% agreed that their patients have expressed fears of  
21  
22 discrimination based on genetic testing and 37% reported that their patients are asking them about  
23  
24 genetic testing and PM. Similar reports of patients expressing fear of discrimination were observed  
25  
26 across specialties (Figure 3); however, more oncologists (50%) reported that patients are asking about  
27  
28 PM compared to 30% of cardiologists and 32% general/family physicians (Figure 3).

### ***Impacts and Benefits***

31 Respondents were asked a series of questions about the impact and benefits of genetic testing in their  
32  
33 practice. Most respondents reported that genetic tests that they have ordered were for the purposes  
34  
35 of identifying a genetic predisposition or risk factor for disorders (60% agreed vs. 20% disagreed) and  
36  
37 that these tests influenced patient treatment plans (54% agreed vs. 18% disagreed). Many also  
38  
39 reported that genetic tests that they have ordered increased therapeutic benefit for patients (42%  
40  
41 agreed vs. 19% disagreed). Comparing across specialties (Figure 4, left panel), oncologist respondents  
42  
43 were more likely to agree that tests that they had ordered had influenced treatment plans (67%  
44  
45 agreed) compared to other specialties (Chi<sup>2</sup> P=0.006). Note that for the purpose of this study 'ordering'  
46  
47 means either requisitioning a test directly or facilitating access through another healthcare  
48  
49  
50  
51  
52  
53  
54  
55  
56  
57  
58  
59  
60

Formatted: Font: Bold

Formatted: Font: Bold

1  
2 professional, such as a medical geneticist or other specialist (56% of respondents reported that they  
3  
4 are responsible for ordering genetic tests for their patients and 31% reported that a geneticist is  
5  
6 responsible for ordering tests for their patients).

### 7 **Barriers to Adoption**

8  
9 Respondents were asked to indicate what they perceive as the main barriers to their practice in genetic  
10  
11 testing and PM. A list of 13 barriers (Table 1) was provided. The top 5 cited barriers were: lack of  
12  
13 clinical practice guidelines, limited provider knowledge, attitudes and awareness of benefits, lack of  
14  
15 evidence-based clinical information, the cost of testing and a lack of time and resources to educate  
16  
17 patients.

### 18 **Access to Testing**

19  
20 With regards to access to appropriate genetic testing for their patients, 50% of respondents agreed  
21  
22 that tests that they believe would be useful in their practice are not readily available, 48% indicated  
23  
24 that the cost of genetic tests is a main barrier to the use of PM, and 33% indicated that the length of  
25  
26 time it takes to obtain results is an important barrier to the use of PM, as the results may not be  
27  
28 attained in adequate time to help make treatment decisions. Compared to other specialties,  
29  
30 oncologists identified the time it takes to obtain results as a barrier to practice (59%) more often than  
31  
32 other specialties (Figure 6). In general these measures relating to access to testing varied across  
33  
34 provinces, possibly reflecting differences in access to genetic testing across Canada (Figure 6).

### 35 **Physician Education**

36  
37 Most respondents reported having no formal undergraduate (92%) or graduate training (89%) in  
38  
39 genetic testing and PM. Interestingly, 73% of respondents have attended university lectures or  
40  
41 engaged in self-study and 75% would like more continuing education in this area. More oncologists  
42  
43 reported having graduate training in this area (27%) compared to other specialties (Chi<sup>2</sup> P=0.0001).

Formatted: Font: Bold

Formatted: Font: Bold

**DISCUSSION**

**Attitudes, Impacts and Benefits** The results of this study indicate that Canadian physicians responding to the survey are optimistic about the promise of PM, and open to its use. The majority of respondents agreed that genetic testing as a component of PM can influence treatment plans (83%) and improve outcomes (70%). This is consistent with a recent survey of molecular oncology testing (MOT) in Ontario where it was reported that MOT is expected to become increasingly prevalent in all areas of diagnosis, prognosis, and treatment in the foreseeable future (21). Similar findings from another Canadian survey (27) and a study of 10,000+ physicians in the United States (28) also support widespread awareness among physicians of the current value and potential impact of PM. Positive perceptions among Canadian physician respondents may facilitate efficient and appropriate adoption of PM into practice.

Deleted: Openness to Adoption¶

Deleted: adoption

Deleted: s

Patient engagement has been identified as a possible factor in physicians' attitudes toward adopting new practices (29, 30). Thirty-seven percent of respondents reported that patients are asking them about genetic testing and PM. Physicians also reported patients expressing fears of discrimination based on genetic testing (Figure 4). Although no existing Canadian legislation specifically prohibits genetic discrimination, a level of protection is provided through the Canadian Human Rights Act (Art. 3) and Canada's Personal Information Protection and Electronic Documents Act. Steps have been taken to strengthen these protections. In April of 2010, Bill C-508, an act to amend the Canadian Human Rights Act to specify genetic discrimination was introduced in parliament (31). Few respondents indicated that patient anxiety concerning test results is a barrier to their practice (Table 1). This is consistent with a recent US study of more than 2,000 individuals, which found no post-test anxiety or adverse outcomes in individuals who received comprehensive genetic profiling (32).

**State of Practice**



Deleted: the

This study showed that oncologists are practicing more in this area (Figures 3 and 4) and are leading in terms of adoption of PM among the specialties surveyed. In terms of access to testing, it was found that this and other measures of the state of practice across the provinces varied (Figure 6). This variability in practice and access across Canada may be due to differences in access to testing services, funding, and the interpretation of the evidence or perception of benefits from province to province. It has been suggested that decision-making related to predictive genetic testing is ad hoc and variable across Canada and that a coordinated national approach is needed (33). Recommendations have been proposed for a coordinated approach to the adoption and funding of genetic testing in Ontario (34). Work in this area is critical to ensuring equitable access and improving parity of healthcare across Canada. A coordinated strategy and implementation across the country may be challenging given the disparate provincially funded and controlled health systems in Canada.

### ***Barriers to Adoption***

A lack of medical guidelines was identified by respondents (61%) as the predominant barrier to adoption, indicating a need for the development of best practices and guidelines to support the implementation of PM. Sharing practices as well as genetic testing and pharmacoeconomic information across provincial healthcare systems is also likely necessary to support efficient and cost-effective national implementation of PM.

Of the respondents, 62% agreed that medical informatics will be critical to delivering PM. Indeed, vast amounts of data will be generated with widespread adoption—and an IT infrastructure for collection, storage, analysis, interpretation, and reporting will be needed (35-37). Furthermore decision support tools, including electronic medical records (EMRs), will be needed to facilitate interpretation and point-of-care decision-making. This may pose a significant barrier in Canada where IT infrastructure and EMR

1  
2 implementation is targeted for completion only in 2015 (38) and lags significantly behind other OECD  
3  
4 nations.

5  
6 Surveys of Canadian (21, 22) and US physicians (28) have reported the need for physician education for  
7  
8 the successful adoption of PM. These studies found that a majority of physicians lack the education,  
9  
10 training, and support for successful adoption. The present study supports these findings. Furthermore  
11  
12 respondents indicated that they are actively pursuing more information with 73% engaging in self-  
13  
14 study. These data support a need for formal and continuing physician education in this area. A 2010  
15  
16 survey of 90 medical schools in the US and Canada found that 80% have begun to incorporate  
17  
18 pharmacogenomic training into their curriculum, however, approximately 60% considered this  
19  
20 instruction at their school to be 'poor' and more than 80% were not considering increasing the level of  
21  
22 instruction within the next 3 years (39).

23  
24 Physicians' perceptions and knowledge of the evidence supporting the clinical and analytical validity of  
25  
26 genetic tests for PM are obviously important for its adoption. Canadian and US studies have  
27  
28 demonstrated that current physician knowledge, real-world data and guidelines relating to PM has  
29  
30 often been insufficient for appropriate adoption (40); even where testing is recommended or publicly  
31  
32 funded (41, 42). In the present study, 51% of respondents agreed that there is sufficient evidence to  
33  
34 order genetic tests for PM. These results suggest either a need for better physician education or a  
35  
36 need for additional supporting evidence for personalized medicine implementation. Most likely both  
37  
38 factors are at play. Further supporting the need for more research was the finding that 53% of  
39  
40 respondents cited the need for evidence-based clinical information as a main barrier to their use of  
41  
42 genetic testing. Translational research is needed to provide more robust data for evaluating clinical  
43  
44 utility and best practices for adoption and implementation within Canada's healthcare system.

1  
2 Furthermore, resources that provide physicians with easy access to accurate and current information  
3  
4 would certainly facilitate appropriate and efficient adoption of PM going forward.  
5

### 6 7 **Conclusions**

8 PM based on genetic testing is currently being practiced in Canada across specialties and provinces.

9  
10 Many physician respondents recognize its benefits and are open to its adoption. Patients are asking

Deleted: s

11 their physicians about genetic testing and PM; however, physicians are not confident in discussing

12  
13 genetic testing and PM with their patients. This may not be surprising considering the overall lack of

14  
15 formal education in the field among surveyed physicians, as well as the limited time and resources

16  
17 available to physicians to do so. These study results also indicate variability in practice and access

18  
19 across Canada, among those surveyed, and point to the need for national strategies and resources that

Deleted: . N

20  
21 facilitate healthcare provider knowledge, training, and practice for efficient adoption.

Deleted: practice, and

Deleted: of beneficial practices in PM  
are needed

22  
23 Soaring healthcare costs across industrialized countries are not sustainable. A few PM pioneers are

24  
25 paving the way toward demonstrating that these new molecular tests can result in better care at lower

26  
27 costs. Indeed, the history of innovation across many industries such as the computer,

28  
29 telecommunications, higher education, transportation and many other sectors has shown that

30  
31 previously inaccessible and expensive products and services can be transformed into accessible and

32  
33 low-cost product and services through technology enablers such as personalized medicine and new

34  
35 business models (43). Hence, if we strive for better healthcare, PM and the new models required for its

36  
37 full implementation present an unavoidable challenge and opportunity to transform our healthcare

38  
39 system into one adapted to the 21st century.  
40  
41  
42  
43  
44  
45  
46  
47  
48  
49  
50  
51  
52  
53  
54  
55  
56  
57  
58  
59  
60

**ACKNOWLEDGEMENTS**

The authors wish to acknowledge Drs. Jean-Claude Tardif, Jean-Michel Turc, Charles Butts, and Simon Sutcliffe for their support in the survey's development and insights into the Canadian personalized medicine landscape, and the analytical support of Alex Kotsopolous, Natalia Lobach and Maureen Hazel.

**COMPETING INTERESTS**

None

**FUNDING STATEMENT**

This study was funded by the Centre of Excellence in Personalized Medicine, a federally funded Canadian Centre of Excellence in Commercialization and Research (CECR).

**SURVEY LIMITATIONS**

Administration of the survey over the period May 26 to Sept 15, 2010 may have negatively influenced the response rate. There may have been differences in respondents based on the medium used to complete the survey (electronic vs. paper-based). The topic of genetic testing and personalized medicine may not have been relevant to all physicians that were sent the survey, which may have negatively affected the response rate. All survey results were based on physicians' self-reports. The physician contact information was purchased through a 3rd party and some data were incomplete or inaccurate.

## REFERENCE LIST

1. President's Council of Advisors on Science and Technology (PCAST) "Priorities for Personalized Medicine" September 2008.  
[http://www.whitehouse.gov/files/documents/ostp/PCAST/pcast\\_report\\_v2.pdf](http://www.whitehouse.gov/files/documents/ostp/PCAST/pcast_report_v2.pdf)
2. Hudson, Thomas J. 2009. Personalized medicine: a transformative approach is needed. CMAJ: Canadian Medical Association Journal = Journal De l'Association Medicale Canadienne 180, no. 9 (April 28): 911-913. doi:10.1503/cmaj.090199.
3. Collins, Francis. 2010. Has the revolution arrived? Nature 464, no. 7289 (April 1): 674-675. doi:10.1038/464674a.
4. Ku, Chee Seng, En Yun Loy, Agus Salim, Yudi Pawitan, and Kee Seng Chia. 2010. The discovery of human genetic variations and their use as disease markers: past, present and future. Journal of Human Genetics 55, no. 7 (July): 403-415. doi:10.1038/jhg.2010.55.
5. Manolio, Teri A, Lisa D Brooks, and Francis S Collins. 2008. A HapMap harvest of insights into the genetics of common disease. The Journal of Clinical Investigation 118, no. 5 (May): 1590-1605. doi:10.1172/JCI34772.
6. Ginsburg, Geoffrey S, and Huntington F Willard. 2009. Genomic and personalized medicine: foundations and applications. Translational Research: The Journal of Laboratory and Clinical Medicine 154, no. 6 (December): 277-287. doi:10.1016/j.trsl.2009.09.005.
7. Molecular Oncology Task Force Report, Ensuring Access to High Quality Molecular Oncology Laboratory Testing and Clinical Cancer Genetic Services in Ontario. Cancer Care Ontario. December 2008. <http://www.cancercare.on.ca/common/pages/UserFile.aspx?fileId=31935>
8. Hamburg, Margaret A, and Francis S Collins. 2010. The path to personalized medicine. The New England Journal of Medicine 363, no. 4 (July 22): 301-304. doi:10.1056/NEJMp1006304.
9. <http://www.pharmgkb.org/clinical/index.jsp>
10. Bates, Stewart. 2010. Progress towards personalized medicine. Drug Discovery Today 15, no. 3-4 (February): 115-120. doi:10.1016/j.drudis.2009.11.001.
11. Winkelmann, Bernhard R, and David Herrington. 2010. Pharmacogenomics--10 years of progress: a cardiovascular perspective. Pharmacogenomics 11, no. 5 (May): 613-616. doi:10.2217/pgs.10.68.

Formatted: Bullets and Numbering

- 1  
2  
3  
4  
5  
6  
7  
8  
9  
10  
11  
12  
13  
14  
15  
16  
17  
18  
19  
20  
21  
22  
23  
24  
25  
26  
27  
28  
29  
30  
31  
32  
33  
34  
35  
36  
37  
38  
39  
40  
41  
42  
43  
44  
45  
46  
47  
48  
49  
50  
51  
52  
53  
54  
55  
56  
57  
58  
59  
60
12. Blakey, John D, and Ian P Hall. 2011. Current Progress in Pharmacogenetics. *British Journal of Clinical Pharmacology* (January 14). doi:10.1111/j.1365-2125.2011.03912.x.  
<http://www.ncbi.nlm.nih.gov/pubmed/21235621>.
13. Diamandis, Maria, Nicole M A White, and George M Yousef. 2010. Personalized medicine: marking a new epoch in cancer patient management. *Molecular Cancer Research: MCR* 8, no. 9 (September): 1175-1187. doi:10.1158/1541-7786.MCR-10-0264.
14. Beijnen, Jos H, and Jan H M Schellens. 2010. Personalized medicine in oncology: a personal view with myths and facts. *Current Clinical Pharmacology* 5, no. 3 (August): 141-147. OR
15. Wright CF, Kroese M. Evaluation of genetic tests for susceptibility to common complex diseases: why, when and how? *Hum Genet.* 2010:127:125-134.
16. Knoppers, Bartha, and Policy Research Initiative (Canada). *Genomics, health and society: emerging issues for public policy.* [Ottawa]: Policy Research Initiative. 2004.  
[http://www.policyresearch.gc.ca/doclib/genomicbook\\_e.pdf](http://www.policyresearch.gc.ca/doclib/genomicbook_e.pdf)
17. Organisation for Economic Co-operation and Development (OECD) publication. *Pharmacogenetics : Opportunities and Challenges for Health Innovation.* Paris, November 2009,  
[http://www.oecd.org/document/6/0,3343,en\\_2649\\_34537\\_39405190\\_1\\_1\\_1\\_1,00.html](http://www.oecd.org/document/6/0,3343,en_2649_34537_39405190_1_1_1_1,00.html)
18. Davis, Jerel C, Laura Furstenthal, Amar A Desai, Troy Norris, Saumya Sutaria, Edd Fleming, and Philip Ma. 2009. The microeconomics of personalized medicine: today's challenge and tomorrow's promise. *Nature Reviews. Drug Discovery* 8, no. 4 (April): 279-286.  
doi:10.1038/nrd2825.
19. Allison, Malorye. 2008. Is personalized medicine finally arriving? *Nature Biotechnology* 26, no. 5 (May): 509-517. doi:10.1038/nbt0508-509.
20. Metcalfe, Kelly A, Isabel Fan, John McLaughlin, Harvey A Risch, Barry Rosen, Joan Murphy, Linda Bradley, Susan Armel, Ping Sun, and Steven A Narod. 2009. Uptake of clinical genetic testing for ovarian cancer in Ontario: a population-based study. *Gynecologic Oncology* 112, no. 1 (January): 68-72. doi:10.1016/j.ygyno.2008.10.007.
21. Miller, Fiona A, Paul Krueger, Robert J Christensen, Catherine Ahern, Ronald F Carter, and Suzanne Kamel-Reid. 2009. Postal survey of physicians and laboratories: practices and perceptions of molecular oncology testing. *BMC Health Services Research* 9: 131.  
doi:10.1186/1472-6963-9-131.
22. Miller, Fiona A, June C Carroll, Brenda J Wilson, Jessica P Bytautas, Judith Allanson, Mario Cappelli, Sonya de Laat, and Fred Saibil. 2010. The primary care physician role in cancer

1  
2 genetics: a qualitative study of patient experience. Family Practice 27, no. 5 (October): 563-569.  
3  
4 doi:10.1093/fampra/cm035.

5 | [23.](#) Adair, Alethea, Robyn Hyde-Lay, Edna Einsiedel, and Timothy Caulfield. 2009. Technology  
6 assessment and resource allocation for predictive genetic testing: A study of the perspectives  
7 of Canadian genetic health care providers. BMC Medical Ethics 10, no. 1: 6. doi:10.1186/1472-  
8 6939-10-6.

9  
10 | [24.](#) Little, J, B Potter, J Allanson, T Caulfield, J C Carroll, and B Wilson. 2009. Canada: public health  
11 genomics. Public Health Genomics 12, no. 2: 112-120. doi:10.1159/000156113.

12 | [25.](#) Vovici Survey Software, <http://www.vovici.com/>

13 | [26.](#) StataCorp. 2009. Stata Statistical Software: Release 11. College Station, TX: StataCorp LP.

14 | [27.](#) Carroll, J C, M Cappelli, F Miller, B J Wilson, E Grunfeld, C Peeters, A G W Hunter, C Gilpin, and P  
15 Prakash. 2008. Genetic services for hereditary breast/ovarian and colorectal cancers -  
16 physicians' awareness, use and satisfaction. Community Genetics 11, no. 1: 43-51.  
17  
18 doi:10.1159/000111639.

19 | [28.](#) <https://www.medcoresearchinstitute.com/community/pharmacogenomics/physicansurvey;jsessionid=14BFD8577F0BC0699643349A4B9F2FFA.node0>

20 | [29.](#) Ohata, Takako, Atsushi Tsuchiya, Maiko Watanabe, Tomohisa Sumida, and Fumio Takada. 2009.  
21 Physicians' opinion for 'new' genetic testing in Japan. Journal of Human Genetics 54, no. 4  
22 (April): 203-208. doi:10.1038/jhg.2009.11.

23 | [30.](#) Lamb, Neil E, Richard M Myers, and Chris Gunter. 2009. Education and personalized genomics:  
24 deciphering the public's genetic health report. Personalized Medicine 6, no. 6 (November 1):  
25 681. doi:10.2217/pme.09.57.

26 | [31.](#) <http://www.ccgf-cceg.ca/sites/default/files/2010-04-14%20-%20Introduction%20of%20BillC-508%20-%20Genetic%20Discrimination.pdf>

27 | [32.](#) Bloss, Cinnamon S, Nicholas J Schork, and Eric J Topol. 2011. Effect of direct-to-consumer  
28 genomewide profiling to assess disease risk. The New England Journal of Medicine 364, no. 6  
29 (February 10): 524-534. doi:10.1056/NEJMoa1011893.

30 | [33.](#) Adair, Alethea, Robyn Hyde-Lay, Edna Einsiedel, and Timothy Caulfield. 2009. Technology  
31 assessment and resource allocation for predictive genetic testing: A study of the perspectives  
32 of Canadian genetic health care providers. BMC Medical Ethics 10, no. 1: 6. doi:10.1186/1472-  
33 6939-10-6.  
34  
35  
36  
37  
38  
39  
40  
41  
42  
43  
44  
45  
46  
47  
48  
49  
50  
51  
52  
53  
54  
55  
56  
57  
58  
59  
60

- 1  
2  
3  
4  
5  
6  
7  
8  
9  
10  
11  
12  
13  
14  
15  
16  
17  
18  
19  
20  
21  
22  
23  
24  
25  
26  
27  
28  
29  
30  
31  
32  
33  
34  
35  
36  
37  
38  
39  
40  
41  
42  
43  
44  
45  
46  
47  
48  
49  
50  
51  
52  
53  
54  
55  
56  
57  
58  
59  
60
34. Ontario Genetics Secretariat. 2009. Genetic Testing, Services and Research, Contributing to the Future Health of Ontarians. White Paper. February 26.
35. Fackler, Jennifer L, and Amy L McGuire. 2009. Paving the Way to Personalized Genomic Medicine: Steps to Successful Implementation. *Current Pharmacogenomics and Personalized Medicine* 7, no. 2 (June 1): 125-132. doi:10.2174/187569209788653998.
36. Kawamoto, Kensaku, David F Lobach, Huntington F Willard, and Geoffrey S Ginsburg. 2009. A national clinical decision support infrastructure to enable the widespread and consistent practice of genomic and personalized medicine. *BMC Medical Informatics and Decision Making* 9: 17. doi:10.1186/1472-6947-9-17.
37. Downing, Gregory J. 2009. Key aspects of health system change on the path to personalized medicine. *Translational Research: The Journal of Laboratory and Clinical Medicine* 154, no. 6 (December): 272-276. doi:10.1016/j.trsl.2009.09.003.
38. [https://www.infoway-inforoute.ca/flash/lang-en/ar2009-2010/docs/CHI\\_AnnualReport\\_2009-2010\\_ENG.pdf](https://www.infoway-inforoute.ca/flash/lang-en/ar2009-2010/docs/CHI_AnnualReport_2009-2010_ENG.pdf)
39. Green, James S, Travis J O'Brien, Vincent A Chiappinelli, and Arthur F Harralson. 2010. Pharmacogenomics instruction in US and Canadian medical schools: implications for personalized medicine. *Pharmacogenomics* 11, no. 9 (September): 1331-1340. doi:10.2217/pgs.10.122.
40. Bellcross, Cecelia A, Katherine Kolor, Katrina A B Goddard, Ralph J Coates, Michele Reyes, and Muin J Khoury. 2011. Awareness and utilization of BRCA1/2 testing among U.S. primary care physicians. *American Journal of Preventive Medicine* 40, no. 1 (January): 61-66. doi:10.1016/j.amepre.2010.09.027.
41. Wu, A C, and A L Fuhlbrigge. 2008. Economic evaluation of pharmacogenetic tests. *Clinical Pharmacology and Therapeutics* 84, no. 2 (August): 272-274. doi:10.1038/clpt.2008.127.
42. Phillips, Kathryn A, Deborah A Marshall, Jennifer S Haas, Elena B Elkin, Su-Ying Liang, Michael J Hassett, Ilia Ferrusi, Jane E Brock, and Stephanie L Van Bebber. 2009. Clinical practice patterns and cost effectiveness of human epidermal growth receptor 2 testing strategies in breast cancer patients. *Cancer* 115, no. 22 (November 15): 5166-5174. doi:10.1002/cncr.24574.
43. Christensen, Clayton. 2009. *The innovator's prescription: a disruptive solution for health care*. New York: McGraw-Hill.
44. [Everett M. Rogers, Diffusion of Innovations, 4th ed. \(New York: The Free Press, 1995\).](#)

Formatted: Font: (Default) Calibri, (Asian) Calibri, Font color: Auto, English (U.S.)

Formatted: Indent: Left: 18 pt, Space After: 0 pt, Line spacing: 1.5 lines

Formatted: Indent: Left: 36 pt



1  
2  
3  
4  
5  
6  
7  
8  
9  
10  
11  
12  
13  
14  
15  
16  
17  
18  
19  
20  
21  
22  
23  
24  
25  
26  
27  
28  
29  
30  
31  
32  
33  
34  
35  
36  
37  
38  
39  
40  
41  
42  
43  
44  
45  
46  
47  
48  
49  
50  
51  
52  
53  
54  
55  
56  
57  
58  
59  
60

For peer review only

STROBE 2007 (v4) Statement—Checklist of items that should be included in reports of *cross-sectional studies*

| Section/Topic                | Item # | Recommendation                                                                                                                                                                       | Reported on page # |
|------------------------------|--------|--------------------------------------------------------------------------------------------------------------------------------------------------------------------------------------|--------------------|
| Title and abstract           | 1      | (a) Indicate the study's design with a commonly used term in the title or the abstract                                                                                               | 1                  |
|                              |        | (b) Provide in the abstract an informative and balanced summary of what was done and what was found                                                                                  | 2                  |
| <b>Introduction</b>          |        |                                                                                                                                                                                      |                    |
| Background/rationale         | 2      | Explain the scientific background and rationale for the investigation being reported                                                                                                 | 4                  |
| Objectives                   | 3      | State specific objectives, including any prespecified hypotheses                                                                                                                     | 5                  |
| <b>Methods</b>               |        |                                                                                                                                                                                      |                    |
| Study design                 | 4      | Present key elements of study design early in the paper                                                                                                                              | 5                  |
| Setting                      | 5      | Describe the setting, locations, and relevant dates, including periods of recruitment, exposure, follow-up, and data collection                                                      | 5                  |
| Participants                 | 6      | (a) Give the eligibility criteria, and the sources and methods of selection of participants                                                                                          | 5                  |
| Variables                    | 7      | Clearly define all outcomes, exposures, predictors, potential confounders, and effect modifiers. Give diagnostic criteria, if applicable                                             | 6                  |
| Data sources/<br>measurement | 8*     | For each variable of interest, give sources of data and details of methods of assessment (measurement). Describe comparability of assessment methods if there is more than one group | 5                  |
| Bias                         | 9      | Describe any efforts to address potential sources of bias                                                                                                                            | 6                  |
| Study size                   | 10     | Explain how the study size was arrived at                                                                                                                                            | 6                  |
| Quantitative variables       | 11     | Explain how quantitative variables were handled in the analyses. If applicable, describe which groupings were chosen and why                                                         | 6                  |
| Statistical methods          | 12     | (a) Describe all statistical methods, including those used to control for confounding                                                                                                | 6                  |
|                              |        | (b) Describe any methods used to examine subgroups and interactions                                                                                                                  | 6                  |
|                              |        | (c) Explain how missing data were addressed                                                                                                                                          | 6                  |
|                              |        | (d) If applicable, describe analytical methods taking account of sampling strategy                                                                                                   | 6                  |
|                              |        | (e) Describe any sensitivity analyses                                                                                                                                                | 6                  |
| <b>Results</b>               |        |                                                                                                                                                                                      |                    |

|                          |     |                                                                                                                                                                                                              |         |
|--------------------------|-----|--------------------------------------------------------------------------------------------------------------------------------------------------------------------------------------------------------------|---------|
| Participants             | 13* | (a) Report numbers of individuals at each stage of study—eg numbers potentially eligible, examined for eligibility, confirmed eligible, included in the study, completing follow-up, and analysed            | 6       |
|                          |     | (b) Give reasons for non-participation at each stage                                                                                                                                                         | 6       |
|                          |     | (c) Consider use of a flow diagram                                                                                                                                                                           |         |
| Descriptive data         | 14* | (a) Give characteristics of study participants (eg demographic, clinical, social) and information on exposures and potential confounders                                                                     | 6       |
|                          |     | (b) Indicate number of participants with missing data for each variable of interest                                                                                                                          | 6       |
| Outcome data             | 15* | Report numbers of outcome events or summary measures                                                                                                                                                         | N/A     |
| Main results             | 16  | (a) Give unadjusted estimates and, if applicable, confounder-adjusted estimates and their precision (eg, 95% confidence interval). Make clear which confounders were adjusted for and why they were included | 6 - 9   |
|                          |     | (b) Report category boundaries when continuous variables were categorized                                                                                                                                    | 6 - 9   |
|                          |     | (c) If relevant, consider translating estimates of relative risk into absolute risk for a meaningful time period                                                                                             | N/A     |
| Other analyses           | 17  | Report other analyses done—eg analyses of subgroups and interactions, and sensitivity analyses                                                                                                               | 6 - 9   |
| <b>Discussion</b>        |     |                                                                                                                                                                                                              |         |
| Key results              | 18  | Summarise key results with reference to study objectives                                                                                                                                                     | 9       |
| Limitations              | 19  | Discuss limitations of the study, taking into account sources of potential bias or imprecision. Discuss both direction and magnitude of any potential bias                                                   | 14      |
| Interpretation           | 20  | Give a cautious overall interpretation of results considering objectives, limitations, multiplicity of analyses, results from similar studies, and other relevant evidence                                   | 9 - 13  |
| Generalisability         | 21  | Discuss the generalisability (external validity) of the study results                                                                                                                                        | 12 - 13 |
| <b>Other information</b> |     |                                                                                                                                                                                                              |         |
| Funding                  | 22  | Give the source of funding and the role of the funders for the present study and, if applicable, for the original study on which the present article is based                                                | 14      |

\*Give information separately for cases and controls in case-control studies and, if applicable, for exposed and unexposed groups in cohort and cross-sectional studies.

**Note:** An Explanation and Elaboration article discusses each checklist item and gives methodological background and published examples of transparent reporting. The STROBE checklist is best used in conjunction with this article (freely available on the Web sites of PLoS Medicine at <http://www.plosmedicine.org/>, Annals of Internal Medicine at <http://www.annals.org/>, and Epidemiology at <http://www.epidem.com/>). Information on the STROBE Initiative is available at [www.strobe-statement.org](http://www.strobe-statement.org).

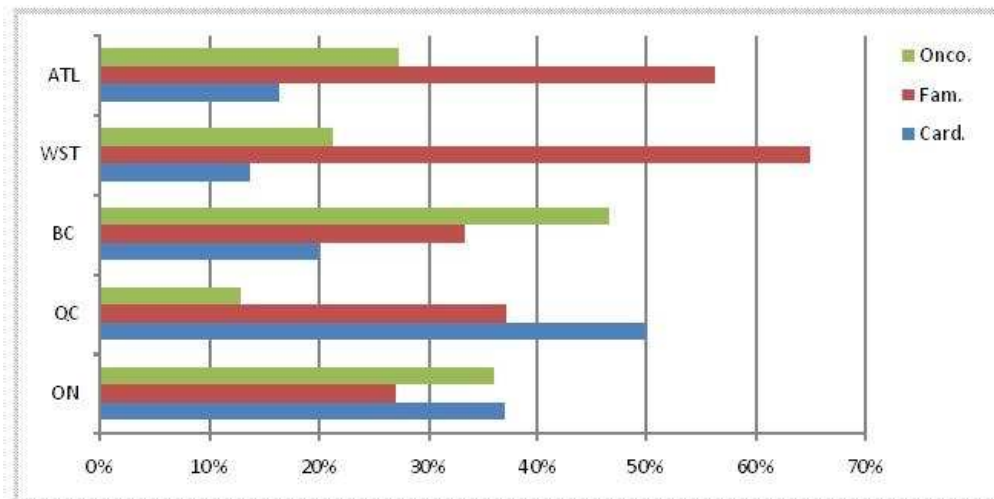

**Figure 1:** Distribution of respondents by specialty (panel A); family medicine (Fam.), Cardiology (Card.) and oncology (Onco.) and by geography (panel B); Ontario (ON), Quebec (QC), British Columbia (BC), Western Provinces (WST) and Atlantic Provinces (ALT).

172x135mm (96 x 96 DPI)

ew only

1  
2  
3  
4  
5  
6  
7  
8  
9  
10  
11  
12  
13  
14  
15  
16  
17  
18  
19  
20  
21  
22  
23  
24  
25  
26  
27  
28  
29  
30  
31  
32  
33  
34  
35  
36  
37  
38  
39  
40  
41  
42  
43  
44  
45  
46  
47  
48  
49  
50  
51  
52  
53  
54  
55  
56  
57  
58  
59  
60

1  
2  
3  
4  
5  
6  
7  
8  
9  
10  
11  
12  
13  
14  
15  
16  
17  
18  
19  
20  
21  
22  
23  
24  
25  
26  
27  
28  
29  
30  
31  
32  
33  
34  
35  
36  
37  
38  
39  
40  
41  
42  
43  
44  
45  
46  
47  
48  
49  
50  
51  
52  
53  
54  
55  
56  
57  
58  
59  
60

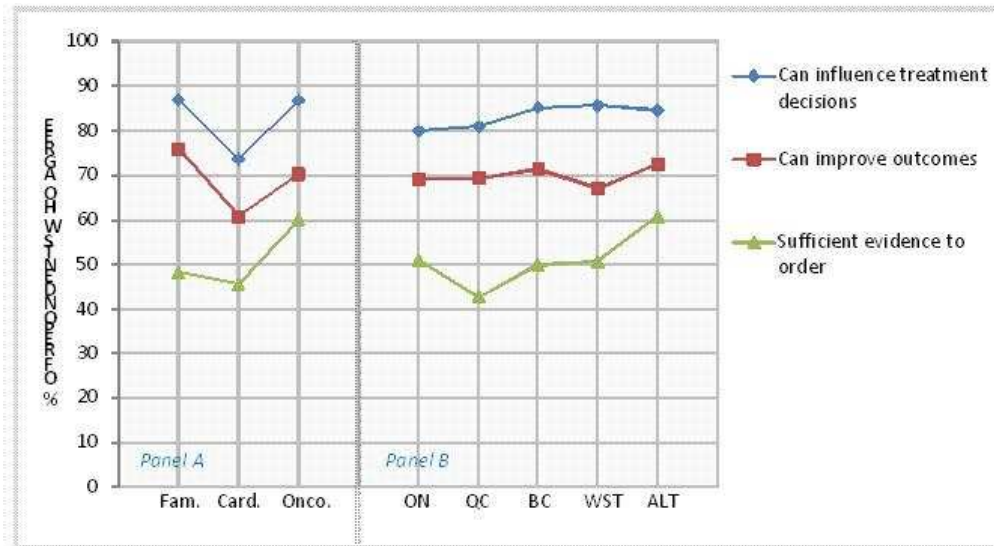

**Figure 2:** Respondents' perceptions of utility by specialty (panel A): family medicine (Fam.), Cardiology (Card.) and oncology (Onco.) and by geography (panel B): Ontario (ON), Quebec (QC), British Columbia (BC), Western Provinces (WST) and Atlantic Provinces (ALT).

176x135mm (96 x 96 DPI)

Review only

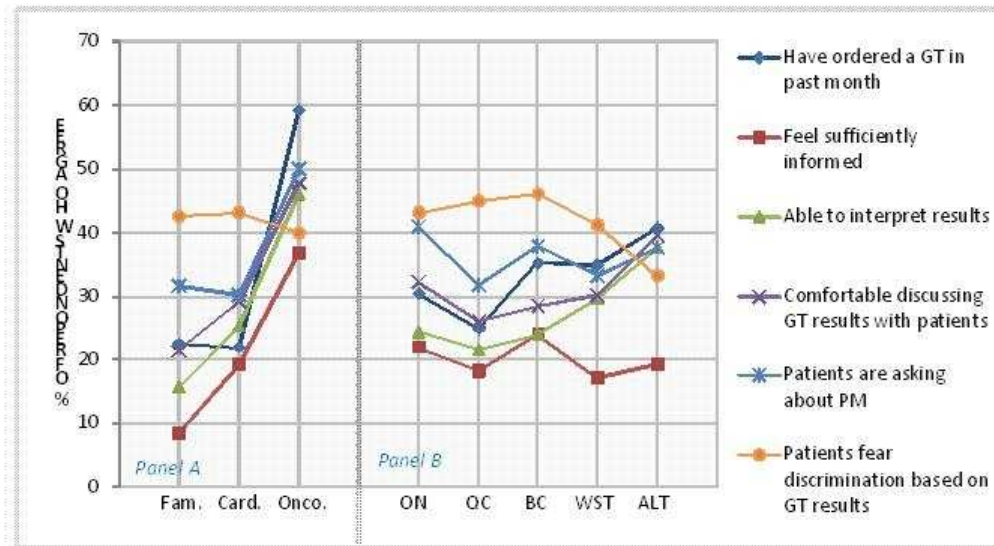

**Figure 3:** Measures of state of practice by specialty (panel A); family medicine (Fam.), Cardiology (Card.) and oncology (Onco.) and by geography (panel B); Ontario (ON), Quebec (QC), British Columbia (BC), Western Provinces (WST) and Atlantic Provinces (ALT).

176x135mm (96 x 96 DPI)

Review only

1  
2  
3  
4  
5  
6  
7  
8  
9  
10  
11  
12  
13  
14  
15  
16  
17  
18  
19  
20  
21  
22  
23  
24  
25  
26  
27  
28  
29  
30  
31  
32  
33  
34  
35  
36  
37  
38  
39  
40  
41  
42  
43  
44  
45  
46  
47  
48  
49  
50  
51  
52  
53  
54  
55  
56  
57  
58  
59  
60

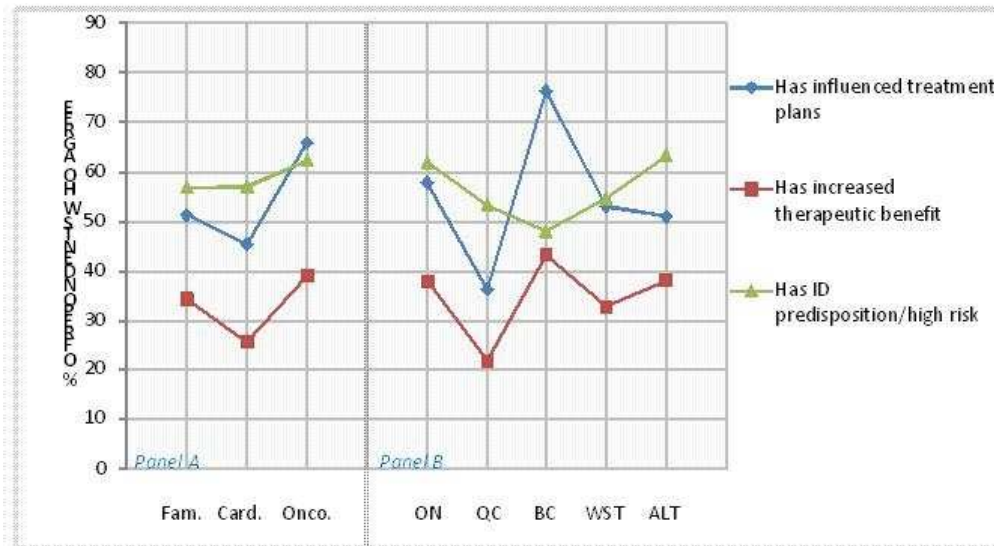

**Figure 4:** Comparison of reported impacts and benefits by specialty (panel A); family medicine (Fam.), Cardiology (Card.) and oncology (Onco.) and by geography (panel B); Ontario (ON), Quebec (QC), British Columbia (BC), Western Provinces (WST) and Atlantic Provinces (ALT).

176x135mm (96 x 96 DPI)

View only

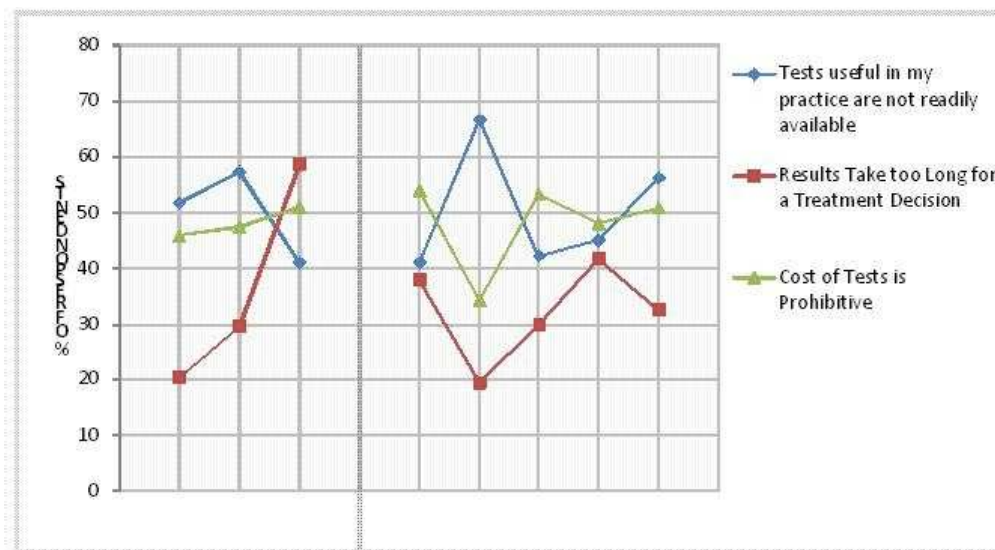

**Figure 5:** Measures of barriers to access by specialty (panel A); family medicine (Fam.), Cardiology (Card.) and oncology (Onco.) and by geography (panel B); Ontario (ON), Quebec (QC), British Columbia (BC), Western Provinces (WST) and Atlantic Provinces (ALT).

176x135mm (96 x 96 DPI)

Review only

1  
2  
3  
4  
5  
6  
7  
8  
9  
10  
11  
12  
13  
14  
15  
16  
17  
18  
19  
20  
21  
22  
23  
24  
25  
26  
27  
28  
29  
30  
31  
32  
33  
34  
35  
36  
37  
38  
39  
40  
41  
42  
43  
44  
45  
46  
47  
48  
49  
50  
51  
52  
53  
54  
55  
56  
57  
58  
59  
60



1  
2  
3  
4  
5  
6  
7  
8  
9  
10  
11  
12  
13  
14  
15  
16  
17  
18  
19  
20  
21  
22  
23  
24  
25  
26  
27  
28  
29  
30  
31  
32  
33  
34  
35  
36  
37  
38  
39  
40  
41  
42  
43  
44  
45  
46  
47  
48  
49  
50  
51  
52  
53  
54  
55  
56  
57  
58  
59  
60

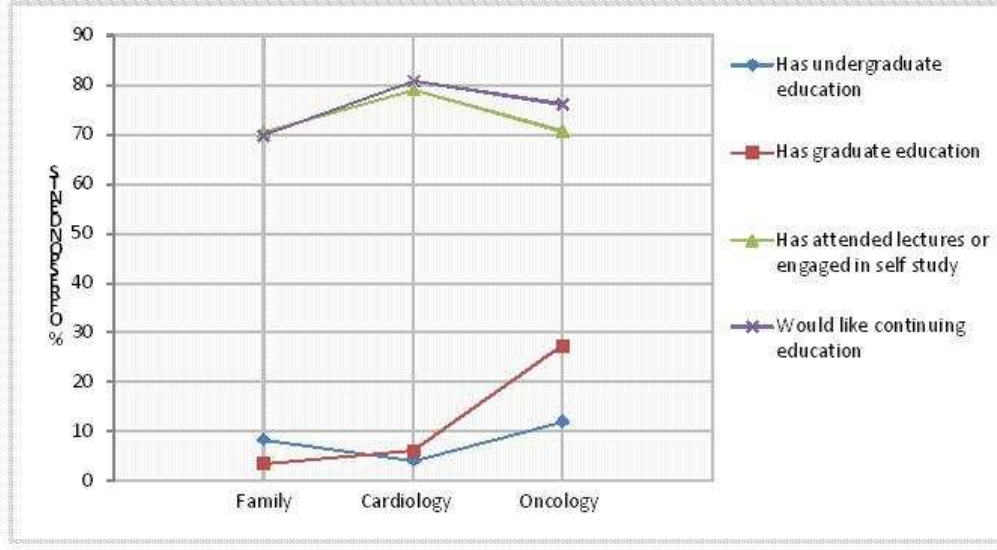

Figure 6: Measures of physician education in genetic testing and PM by specialty.

176x135mm (96 x 96 DPI)

Review only



**Personalized Medicine in Canada: A Survey of Adoption and Practice in Oncology, Cardiology and Family Medicine**

|                               |                                                                                                                                                                                                                                                                                                    |
|-------------------------------|----------------------------------------------------------------------------------------------------------------------------------------------------------------------------------------------------------------------------------------------------------------------------------------------------|
| Journal:                      | <i>BMJ Open</i>                                                                                                                                                                                                                                                                                    |
| Manuscript ID:                | bmjopen-2011-000110.R2                                                                                                                                                                                                                                                                             |
| Article Type:                 | Research                                                                                                                                                                                                                                                                                           |
| Date Submitted by the Author: | 25-May-2011                                                                                                                                                                                                                                                                                        |
| Complete List of Authors:     | Bonter, Katherine; Centre of Excellence in Personalized Medicine<br>Desjardins, Clarissa; Centre of Excellence in Personalized Medicine<br>Currier, Nathan; Centre of Excellence in Personalized Medicine<br>Pun, Jason; PricewaterhouseCoopers LLP<br>Ashbury, Fredrick; PICEPS Consultants, Inc. |
| <b>Subject Heading</b>:       | Genetics                                                                                                                                                                                                                                                                                           |
| Keywords:                     | physician practice, personalized medicine, genetic testing, physician behaviour, risk assessment, survey                                                                                                                                                                                           |
|                               |                                                                                                                                                                                                                                                                                                    |

SCHOLARONE™  
Manuscripts

only

1  
2  
3 **Personalized Medicine in Canada: A Survey of Adoption and Practice in Oncology, Cardiology and**  
4  
5 **Family Medicine**  
6

7  
8  
9 Corresponding Author: Dr. Clarissa Desjardins, 5000 rue Belanger Est

10  
11 Montréal, Québec, H1T 1C8, tel.514-670-7660; email: [cdesjardins@cepmed.com](mailto:cdesjardins@cepmed.com)  
12

13  
14  
15 Bonter, Katherine MSc<sup>1</sup>, Desjardins, Clarissa PhD<sup>1</sup>, Currier, Nathan PhD<sup>1</sup>, Pun, Jason MSc MBA<sup>2</sup>,  
16  
17 Ashbury, Fredrick D. PhD<sup>2,3,4</sup>  
18  
19

- 20  
21  
22  
23 1 Centre of Excellence in Personalized Medicine (Cepmed), Montreal, Québec, Canada  
24 2 PricewaterhouseCoopers LLP, Toronto, Ontario, Canada  
25 3 Division of Preventive Oncology, Department of Oncology, University of Calgary, Calgary,  
26  
27 Alberta Canada  
28  
29 4 Dalla Lana School of Public Health, University of Toronto, Toronto, Ontario, Canada  
30  
31  
32  
33  
34  
35

36  
37 Keywords: personalized medicine, genetic testing, survey, physician behaviour, risk assessment  
38

39  
40 Word count: 3,143  
41  
42  
43  
44  
45  
46  
47  
48  
49  
50  
51  
52  
53  
54  
55  
56  
57  
58  
59  
60

## ABSTRACT

In order to provide baseline data relating to genetic testing as a key element of personalized medicine (PM), Canadian physicians were surveyed to understand roles, perceptions and experiences in this area. The survey measured attitudes practice, observed benefits and impacts, and barriers to adoption.

A self-administered survey was provided to Canadian oncologists, cardiologists and family physicians and responses were obtained online, by mail or by fax. The survey was designed to be exploratory. Comparisons of data were made across specialties and geography.

An overall response rate of 8.3% was obtained. Of the respondents, 43%, 30% and 27% were family physicians, cardiologists or oncologists respectively. A strong majority of respondents agreed that genetic testing and PM can have a positive impact on their practice however only 51% agreed that there is sufficient evidence to order such tests. A low percentage of respondents feel that they are sufficiently informed and confident practicing in this area, however many reported that genetic tests they have ordered have benefited their patients. Half of the respondents agreed that genetic tests that would be useful in their practice are not readily available. A lack of practice guidelines, limited provider knowledge and lack of evidence-based clinical information were cited as the main barriers to practice. Differences across provinces were observed for measures relating to access to testing and the state of practice. Differences across specialties were observed for the state of practice, reported benefits and access to testing.

Canadian physicians recognize the benefits of genetic testing and PM; however they lack the education, information and support needed to practice effectively in this area. Variability in practice and access to testing across specialties and across Canada was observed. These results support a need for national strategies and resources to facilitate physician knowledge, training and practice in PM.

## ARTICLE SUMMARY

### Article Focus:

- Canadian physicians' perceptions and experience relating to genetic testing and personalized medicine (PM)
- Practice and impact of genetic testing and PM in Canada and across specialties
- Implications for continued adoption of genetic testing and PM in Canada across specialties

### Key Messages:

- 1
- 2
- 3
- 4
- 5
- 6
- 7
- 8
- 9
- 10
- 11
- 12
- 13
- 14
- 15
- 16
- 17
- 18
- 19
- 20
- 21
- 22
- 23
- 24
- 25
- 26
- 27
- 28
- 29
- 30
- 31
- 32
- 33
- 34
- 35
- 36
- 37
- 38
- 39
- 40
- 41
- 42
- 43
- 44
- 45
- 46
- 47
- 48
- 49
- 50
- 51
- 52
- 53
- 54
- 55
- 56
- 57
- 58
- 59
- 60
- Family physicians, cardiologists and oncologists across Canada are practicing personalized medicine and recognize its benefits and potential impacts
- Physicians reported a number of barriers to the adoption of PM that are currently affecting medical practice in Canada
- The practice of and access to genetic testing and personalized medicine varies both across specialties and provinces that will have an impact on continued adoption in this area

#### **AUTHORS' CONTRIBUTIONS**

All authors were involved in the design of the survey, interpretation of results and drafting the article.

In addition, Pun and Ashbury were involved in the implementation, data collection, and analysis. Three co-authors (Desjardins, Bonter and Currier) are employed by Cepmed. Pun and Ashbury were employed by PricewaterhouseCoopers LLP, and were commissioned by Cepmed to lead the survey project.

## INTRODUCTION

*“for the sweet ones [treatments] do not benefit everyone, nor do the astringent ones, nor are all the patients able to drink the same things”*  
*(Hippocrates)*

Personalized medicine (PM), the tailoring of medical treatment or prevention to the individual characteristics of each patient, has been enabled by recent advances in molecular biology (1). Research in the ‘-omic’ sciences has resulted in improved understanding of the relationships between genes, proteins and disease, providing more tools for PM (2-5) and driving a shift in medical practice (6). Evidence of this ‘shift’ include a 66% increase in cancer-related genetic testing in Ontario between 2002 and 2008 (7), the fact that 10% of FDA approved drugs include pharmacogenomic information on their labels (8), and that genetic testing is recommended or required for at least 11 FDA approved drugs (9) and for 10 Health Canada approved drugs (based on a review of drug labeling using the Health Canada Drug Product Database). A number of applications of PM based on genetic testing are currently in use (10). Pharmacogenomics, the optimization of drug therapy based on genetic information, has been applied to improve clinical outcomes or reduce side effects and adverse events (11, 12). Targeted therapeutics, used in combination with companion diagnostics has been particularly successful in improving the treatment of cancer (13, 14). Finally, PM is being used to assess disease risk, facilitating prevention and early detection (15).

As a result of these developments PM has become an increasingly important topic for physicians, healthcare organizations and the public (16-17). There is widespread debate as to the intended and unintended consequences of PM on the quality and cost of healthcare, however many scientific and medical leaders expect PM to increase the quality of healthcare and reduce overall healthcare costs (13,18,19). A few studies have assessed the adoption of genetic testing and its impact on the role and practice of physicians in Canada (20-24). These studies focused primarily on the adoption of genetic

1  
2  
3 tests for diagnosis and treatment of cancer within Ontario's healthcare system, as well as the needs  
4 and recommendations for physician education, public education and improved coordination of  
5 healthcare delivery and genetic testing services. In order to facilitate medical and continuing  
6 professional education in personalized medicine in Canada, it is essential to have a baseline  
7 understanding of current knowledge, attitudes, and practices.  
8  
9  
10  
11  
12  
13

14  
15 The present pan-Canadian survey of practicing oncologists, cardiologists and family doctors was  
16 designed to provide baseline data relating to genetic testing as a key element of PM in Canada with  
17 respect to attitudes, state of practice, and barriers to adoption. There were three specialties chosen as  
18 the target audience for the survey: cardiologists and oncologists were chosen as they will experience  
19 higher volumes and needs for personalized genetic testing while family physicians are usually the first  
20 point of contact for patients, and are often involved with screening for risk of disease.  
21  
22  
23  
24  
25  
26  
27

## 28 **METHODS**

29  
30  
31 Ethics approval was received from IRB Services to survey a sample of Canadian physicians (oncologists,  
32 cardiologists, and family physicians) regarding their knowledge, training and practice in genetic testing  
33 and personalized medicine.  
34  
35

36  
37 Physician contact information was obtained from a 3rd party including information for 859 oncologists  
38 and 1, 165 cardiologists from across Canada. A weighted sample, based on population, of family  
39 physicians (n = 2,334) from Canadian provinces, was randomly selected from contacts with email  
40 addresses. The self-administered survey was available in French and English and distributed by mail,  
41 fax and email during the period May 26 to Sept 15, 2010. Respondents submitted their responses  
42 online, by mail or by fax. Survey candidates were contacted with up to four reminders to encourage  
43 participation. The survey questions were related to demographic information, training, practice,  
44 knowledge and education in PM based on genetic testing, nature and extent of practice in this area,  
45 and of the benefits of PM and barriers to its adoption. Questions were developed based on the  
46 authors' knowledge of genetic testing and PM. A draft of the survey questions was developed from this  
47 knowledge base and a review of the literature of previous surveys conducted in other jurisdictions (28,  
48 29). This draft survey was subsequently reviewed by 11 physicians (5 oncologists, 3 cardiologists, 3  
49 family physicians) and their feedback was incorporated into the final survey. The survey's design was  
50  
51  
52  
53  
54  
55  
56  
57  
58  
59  
60

1  
2  
3 informed by thinking about how new technologies or innovations are adopted in practice and a  
4 diffusion of innovations framework was considered (44). The survey solicited physicians' knowledge of,  
5 attitudes, and practice of personalized genetic testing to understand the relative advantage,  
6 compatibility, ease of implementation, and system response to understand adoption of personalized  
7 genetic testing. This is an initial application of this framework to the Canadian context.  
8  
9 Vovici software (25) was used for the online survey administration, allowing for both open-ended and  
10 close-ended questions, and menu creation for selection of pre-determined answer options for close-  
11 ended questions. All questionnaires were reviewed for completeness. The data entry protocol  
12 included separate quality review of each survey against the entered data to ensure accuracy. Survey  
13 results were analyzed using STATA software version 11.0 (26).  
14  
15  
16  
17  
18  
19  
20  
21  
22  
23

24 This study was designed to be exploratory including analyses based on descriptive statistics and  
25 bivariate associations. Inferential analyses were not pursued. Answers to survey questions were  
26 compared according to medical specialty and region or province. Responses from the Atlantic  
27 Provinces, Saskatchewan, Manitoba and Alberta were low relative to Ontario, Quebec and British  
28 Columbia (BC). Data from the Atlantic Provinces (ATL), Nova Scotia, New Brunswick, Newfoundland  
29 and Prince Edward Island, were combined and data from Saskatchewan, Manitoba and Alberta (WST)  
30 were combined.  
31  
32  
33  
34  
35  
36  
37  
38  
39  
40

41 Due to the small sample of responses for certain questions, results with more than a 5% probability of  
42 occurring by chance were excluded. Pearson chi-squared test statistics were calculated to determine  
43 whether differences according to medical specialty, region or province were statistically significant.  
44  
45  
46  
47

## 48 **RESULTS**

### 49 ***Respondent Profile***

50  
51 A total of 363 physicians provided responses to the survey (8.3% overall response rate). Physicians not  
52 providing direct patient care (n=16) or not practicing in family medicine, cardiology or oncology (n=6)  
53  
54  
55  
56  
57  
58  
59  
60



1  
2  
3 were excluded. Thus, the respondent group retained for the analysis comprised 341 active physicians  
4  
5 with an adjusted response rate of 9.7%.  
6  
7

8  
9 Of the respondents, 43%, 30% and 27% were family physicians, cardiologists and oncologists,  
10  
11 respectively. Thirty-three percent of the respondents practiced in Ontario (ON), 20% in Quebec (QU),  
12  
13 24% in Manitoba, Saskatchewan and Alberta (WST), 14% in the Atlantic Provinces (ATL) and 9% in  
14  
15 British Columbia (BC). Of the cardiologist and oncologist respondents, 73% and 79%, respectively, held  
16  
17 academic appointments, compared to 41% of family physician respondents. One-third of survey  
18  
19 respondents were in the 46-55 age range. The average time since completion of training for  
20  
21 participating oncologists was 12 years, 18 years for cardiologists, and 22 years for family physicians.  
22  
23  
24 Family physician respondents reported working predominately in offices or clinics, cardiologist  
25  
26 respondents predominantly in academic health science centres, community hospitals and private  
27  
28 office/clinic and oncologist respondents predominantly in academic health sciences centres.  
29  
30  
31 Respondents from all specialties were represented for each geographic area as shown in Figure 1.  
32  
33  
34

### 35 ***Attitudes and Perceptions***

36  
37 Respondents were asked a series of questions about their attitudes and perceptions of the usefulness  
38  
39 of genetic testing in the context of PM, as an indicator of physicians' openness to the adoption of PM.  
40  
41 The majority of respondents agreed that knowing a patient's genetic profile can influence treatment  
42  
43 decision-making (83%) and importantly, can improve patient outcomes (70%). However, only 51% of  
44  
45 respondents agreed that there is sufficient evidence in support of ordering genetic tests. The  
46  
47 perception of the usefulness of genetic testing was similar across specialties and provinces as no  
48  
49 significant differences were observed (Figure 2).  
50  
51  
52  
53  
54  
55  
56  
57  
58  
59  
60

### ***State of Practice***

Respondents' current levels of practice and knowledge of genetic testing and PM were also assessed. The results indicate that oncologist respondents are practicing more PM with 59% reporting having ordered a genetic test in the past month compared to only 22% of general practitioners and cardiologists. Oncologists also reported feeling more sufficiently informed, more able to interpret test results and more comfortable discussing results with patients compared to other specialties (Figure 3). Overall only 21% of respondents agreed that they are sufficiently informed about PM and 29% agreed that they are able to interpret the results of genetic tests. Thirty percent of respondents agreed that they are comfortable discussing test results with patients. These measures appear to be consistent across provinces (Figure 3). The survey also assessed physicians' perceptions of the impact of genetic testing on their patients. Of the respondents, 40% agreed that their patients have expressed fears of discrimination based on genetic testing and 37% reported that their patients are asking them about genetic testing and PM. Similar reports of patients expressing fear of discrimination were observed across specialties (Figure 3); however, more oncologists (50%) reported that patients are asking about PM compared to 30% of cardiologists and 32% general/family physicians (Figure 3).

### ***Impacts and Benefits***

Respondents were asked a series of questions about the impact and benefits of genetic testing in their practice. Most respondents reported that genetic tests that they have ordered were for the purposes of identifying a genetic predisposition or risk factor for disorders (60% agreed vs. 20% disagreed) and that these tests influenced patient treatment plans (54% agreed vs. 18% disagreed). Many also reported that genetic tests that they have ordered increased therapeutic benefit for patients (42% agreed vs. 19% disagreed). Comparing across specialties (Figure 4, left panel), oncologist respondents were more likely to agree that tests that they had ordered had influenced treatment plans (67% agreed) compared to other specialties ( $\text{Chi}^2 P=0.006$ ). Note that for the purpose of this study 'ordering'

1  
2  
3 means either requisitioning a test directly or facilitating access through another healthcare  
4  
5 professional, such as a medical geneticist or other specialist (56% of respondents reported that they  
6  
7 are responsible for ordering genetic tests for their patients and 31% reported that a geneticist is  
8  
9 responsible for ordering tests for their patients).  
10  
11

### 12 ***Barriers to Adoption***

13  
14 Respondents were asked to indicate what they perceive as the main barriers to their practice in genetic  
15  
16 testing and PM. A list of 13 barriers (Table 1) was provided. The top 5 cited barriers were: lack of  
17  
18 clinical practice guidelines, limited provider knowledge, attitudes and awareness of benefits, lack of  
19  
20 evidence-based clinical information, the cost of testing and a lack of time and resources to educate  
21  
22 patients.  
23  
24  
25

### 26 ***Access to Testing***

27  
28 With regards to access to appropriate genetic testing for their patients, 50% of respondents agreed  
29  
30 that tests that they believe would be useful in their practice are not readily available, 48% indicated  
31  
32 that the cost of genetic tests is a main barrier to the use of PM, and 33% indicated that the length of  
33  
34 time it takes to obtain results is an important barrier to the use of PM, as the results may not be  
35  
36 attained in adequate time to help make treatment decisions. Compared to other specialties,  
37  
38 oncologists identified the time it takes to obtain results as a barrier to practice (59%) more often than  
39  
40 other specialties (Figure 6). In general these measures relating to access to testing varied across  
41  
42 provinces, possibly reflecting differences in access to genetic testing across Canada (Figure 6).  
43  
44  
45  
46  
47

### 48 ***Physician Education***

49  
50 Most respondents reported having no formal undergraduate (92%) or graduate training (89%) in  
51  
52 genetic testing and PM. Interestingly, 73% of respondents have attended university lectures or  
53  
54 engaged in self-study and 75% would like more continuing education in this area. More oncologists  
55  
56 reported having graduate training in this area (27%) compared to other specialties ( $\text{Chi}^2$   $P=0.0001$ ).  
57  
58  
59  
60

## DISCUSSION

### *Attitudes, Impacts and Benefits*

The results of this study indicate that Canadian physicians responding to the survey are optimistic about the promise of PM, and open to its use. The majority of respondents agreed that genetic testing as a component of PM can influence treatment plans (83%) and improve outcomes (70%). This is consistent with a recent survey of molecular oncology testing (MOT) in Ontario where it was reported that MOT is expected to become increasingly prevalent in all areas of diagnosis, prognosis, and treatment in the foreseeable future (21). Similar findings from another Canadian survey (27) and a study of 10,000+ physicians in the United States (28) also support widespread awareness among physicians of the current value and potential impact of PM. Positive perceptions among Canadian physician respondents may facilitate efficient and appropriate adoption of PM into practice.

Patient engagement has been identified as a possible factor in physicians' attitudes toward adopting new practices (29, 30). Thirty-seven percent of respondents reported that patients are asking them about genetic testing and PM. Physicians also reported patients expressing fears of discrimination based on genetic testing (Figure 4). Although no existing Canadian legislation specifically prohibits genetic discrimination, a level of protection is provided through the Canadian Human Rights Act (Art. 3) and Canada's Personal Information Protection and Electronic Documents Act. Steps have been taken to strengthen these protections. In April of 2010, Bill C-508, an act to amend the Canadian Human Rights Act to specify genetic discrimination was introduced in parliament (31). Few respondents indicated that patient anxiety concerning test results is a barrier to their practice (Table 1). This is consistent with a recent US study of more than 2,000 individuals, which found no post-test anxiety or adverse outcomes in individuals who received comprehensive genetic profiling (32).

### ***State of Practice***

This study showed that oncologists are practicing more in this area (Figures 3 and 4) and are leading in terms of adoption of PM among the specialties surveyed. In terms of access to testing, it was found that this and other measures of the state of practice across the provinces varied (Figure 6). This variability in practice and access across Canada may be due to differences in access to testing services, funding, and the interpretation of the evidence or perception of benefits from province to province. It has been suggested that decision-making related to predictive genetic testing is ad hoc and variable across Canada and that a coordinated national approach is needed (33). Recommendations have been proposed for a coordinated approach to the adoption and funding of genetic testing in Ontario (34). Work in this area is critical to ensuring equitable access and improving parity of healthcare across Canada. A coordinated strategy and implementation across the country may be challenging given the disparate provincially funded and controlled health systems in Canada.

### ***Barriers to Adoption***

A lack of medical guidelines was identified by respondents (61%) as the predominant barrier to adoption, indicating a need for the development of best practices and guidelines to support the implementation of PM. Sharing practices as well as genetic testing and pharmacoeconomic information across provincial healthcare systems is also likely necessary to support efficient and cost-effective national implementation of PM.

Of the respondents, 62% agreed that medical informatics will be critical to delivering PM. Indeed, vast amounts of data will be generated with widespread adoption—and an IT infrastructure for collection, storage, analysis, interpretation, and reporting will be needed (35-37). Furthermore decision support tools, including electronic medical records (EMRs), will be needed to facilitate interpretation and point-of-care decision-making. This may pose a significant barrier in Canada where IT infrastructure and EMR

1  
2  
3 implementation is targeted for completion only in 2015 (38) and lags significantly behind other OECD  
4  
5 nations.  
6  
7

8  
9 Surveys of Canadian (21, 22) and US physicians (28) have reported the need for physician education for  
10  
11 the successful adoption of PM. These studies found that a majority of physicians lack the education,  
12  
13 training, and support for successful adoption. The present study supports these findings. Furthermore  
14  
15 respondents indicated that they are actively pursuing more information with 73% engaging in self-  
16  
17 study. These data support a need for formal and continuing physician education in this area. A 2010  
18  
19 survey of 90 medical schools in the US and Canada found that 80% have begun to incorporate  
20  
21 pharmacogenomic training into their curriculum, however, approximately 60% considered this  
22  
23 instruction at their school to be 'poor' and more than 80% were not considering increasing the level of  
24  
25 instruction within the next 3 years (39).  
26  
27  
28

29  
30 Physicians' perceptions and knowledge of the evidence supporting the clinical and analytical validity of  
31  
32 genetic tests for PM are obviously important for its adoption. Canadian and US studies have  
33  
34 demonstrated that current physician knowledge, real-world data and guidelines relating to PM has  
35  
36 often been insufficient for appropriate adoption (40); even where testing is recommended or publicly  
37  
38 funded (41, 42). In the present study, 51% of respondents agreed that there is sufficient evidence to  
39  
40 order genetic tests for PM. These results suggest either a need for better physician education or a  
41  
42 need for additional supporting evidence for personalized medicine implementation. Most likely both  
43  
44 factors are at play. Further supporting the need for more research was the finding that 53% of  
45  
46 respondents cited the need for evidence-based clinical information as a main barrier to their use of  
47  
48 genetic testing. Translational research is needed to provide more robust data for evaluating clinical  
49  
50 utility and best practices for adoption and implementation within Canada's healthcare system.  
51  
52  
53  
54  
55  
56  
57  
58  
59  
60

1  
2  
3 Furthermore, resources that provide physicians with easy access to accurate and current information  
4  
5 would certainly facilitate appropriate and efficient adoption of PM going forward.  
6  
7

## 8 9 **Conclusions**

10  
11 In the absence of baseline data in provider knowledge and practice of PM in Canada, our study fills this  
12  
13 important gap by providing a baseline upon which we can build. While other jurisdictions may have  
14  
15 more resources in place to support PM, including those that facilitate provider and public  
16  
17 understanding, Canada is lagging. PM based on genetic testing is currently being practiced in Canada  
18  
19 across specialties and provinces. Many physician respondents recognize its benefits and appear to be  
20  
21 open to its adoption. They report that patients are asking them about genetic testing and PM;  
22  
23 however, most physician respondents are not confident in discussing genetic testing and PM with their  
24  
25 patients. This may not be surprising considering the overall lack of formal education in the field among  
26  
27 surveyed physicians, as well as the limited time and resources available for physicians to do so. These  
28  
29 study results also indicate variability in practice and access to genetic tests across Canada, among those  
30  
31 surveyed. In addition, the study results point to the need for pan-Canadian strategies and resources  
32  
33 that facilitate healthcare provider knowledge, training, and practice at the undergraduate and graduate  
34  
35 levels, and through targeted continuing professional education interventions.  
36  
37

38  
39 Soaring healthcare costs across industrialized countries are not sustainable. A few PM pioneers are  
40  
41 paving the way toward demonstrating that these new molecular tests may result in better care at lower  
42  
43 costs. Indeed, the history of innovation across many industries such as the computer,  
44  
45 telecommunications, higher education, transportation and many other sectors has shown that  
46  
47 previously inaccessible and expensive products and services can be made more accessible at lower  
48  
49 cost (43). Hence, if we strive for better healthcare, PM and the new models required for its full  
50  
51 implementation present an unavoidable challenge and perhaps an opportunity to transform our  
52  
53 healthcare system into one adapted to the 21st century.  
54  
55  
56  
57  
58  
59  
60

**ACKNOWLEDGEMENTS**

The authors wish to acknowledge Drs. Jean-Claude Tardif, Jean-Michel Turc, Charles Butts, and Simon Sutcliffe for their support in the survey's development and insights into the Canadian personalized medicine landscape, and the analytical support of Alex Kotsopolous, Natalia Lobach and Maureen Hazel.

**COMPETING INTERESTS**

None

**FUNDING STATEMENT**

This study was funded by the Centre of Excellence in Personalized Medicine, a federally funded Canadian Centre of Excellence in Commercialization and Research (CECR).

**SURVEY LIMITATIONS**

Administration of the survey over the period May 26 to Sept 15, 2010 may have negatively influenced the response rate. There may have been differences in respondents based on the medium used to complete the survey (electronic vs. paper-based). The topic of genetic testing and personalized medicine may not have been relevant to all physicians that were sent the survey, which may have negatively affected the response rate. All survey results were based on physicians' self-reports. The physician contact information was purchased through a 3rd party and some data were incomplete or inaccurate.



## REFERENCE LIST

1. President's Council of Advisors on Science and Technology (PCAST) "Priorities for Personalized Medicine" September 2008.  
[http://www.whitehouse.gov/files/documents/ostp/PCAST/pcast\\_report\\_v2.pdf](http://www.whitehouse.gov/files/documents/ostp/PCAST/pcast_report_v2.pdf)
2. Hudson TJ. Personalized medicine: a transformative approach is needed. *CMAJ* 2009;180,9: 911-913.
3. Collins FS. Has the revolution arrived? *Nature* 2010;464(7289):674-5.
4. Ku CS, Loy EY, Salim A, Pawitan Y, Chia KS. The discovery of human genetic variations and their use as disease markers: past, present and future. *J Hum Genet* 2010;55(7):403-415.
5. Manolio TA, Brooks LD, and Collins FS. A HapMap harvest of insights into the genetics of common disease. *J Clin Invest* 2008;118(5):1590-1605.
6. Ginsburg GS and Willard HF. Genomic and personalized medicine: foundations and applications. *J Lab Clin Med* 2009;154(6):277-287.
7. Molecular Oncology Task Force Report, Ensuring Access to High Quality Molecular Oncology Laboratory Testing and Clinical Cancer Genetic Services in Ontario. Cancer Care Ontario. December 2008. <http://www.cancercare.on.ca/common/pages/UserFile.aspx?fileId=31935>. Accessed November 2010.
8. Hamburg MA, Collins FS. The path to personalized medicine. *N Eng J Med* 2010;363(4):301-304.
9. Pharmacogenomics Knowledge Base: <http://www.pharmgkb.org/clinical/index.jsp>. Accessed November 2010.
10. Bates S. 2010. Progress towards personalized medicine. *Drug Discov Today* 2009;15(3-4):115-120.
11. Winkelmann BR, Herrington D. Pharmacogenomics-10 years of progress: a cardiovascular perspective. *Pharmacogenomics* 2010;11(5):613-616.
12. Blakey JD, Hall IP. Current Progress in Pharmacogenetics. *J Clin Pharmacol* 2011;71(6):824-31.
13. Diamandis M, White NM, Yousef GM. Personalized medicine: marking a new epoch in cancer patient management. *Mol Cancer Res* 2010;8(9):1175-87.
14. Beijnen, JH, Schellens JH. Personalized medicine in oncology: a personal view with myths and facts. *Curr Clin Pharmacol* 2010;5(3):141-147.
15. Wright CF, Kroese M. Evaluation of genetic tests for susceptibility to common complex diseases: why, when and how? *Hum Genet* 2010;127:125-134.

- 1  
2  
3  
4  
5  
6  
7  
8  
9  
10  
11  
12  
13  
14  
15  
16  
17  
18  
19  
20  
21  
22  
23  
24  
25  
26  
27  
28  
29  
30  
31  
32  
33  
34  
35  
36  
37  
38  
39  
40  
41  
42  
43  
44  
45  
46  
47  
48  
49  
50  
51  
52  
53  
54  
55  
56  
57  
58  
59  
60
16. Knoppers BM, Scriver C. Genomics, health and society: emerging issues for public policy. [Ottawa]: Policy Research Initiative. 2004.  
[http://www.policyresearch.gc.ca/doclib/genomicbook\\_e.pdf](http://www.policyresearch.gc.ca/doclib/genomicbook_e.pdf). Accessed November 2010.
17. Organisation for Economic Co-operation and Development (OECD) publication. Pharmacogenetics : Opportunities and Challenges for Health Innovation. Paris, November 2009,  
[http://www.oecd.org/document/6/0,3343,en\\_2649\\_34537\\_39405190\\_1\\_1\\_1\\_1,00.html](http://www.oecd.org/document/6/0,3343,en_2649_34537_39405190_1_1_1_1,00.html). Accessed November 2010.
18. Davis JC, Furstenthal L, Desai AA et al. The microeconomics of personalized medicine: today's challenge and tomorrow's promise. *Nature Rev Drug Discov* 2009;8(4):279-286.
19. Allison M. Is personalized medicine finally arriving? *Nature Biotechnol* 2008;26(5):509-517.
20. Metcalfe KA, Fan I, McLaughlin J, Risch HA et al. Uptake of clinical genetic testing for ovarian cancer in Ontario: a population-based study. *Gynecol Oncol* 2009;112(1):68-72.
21. Miller FA, Krueger P, Christensen RJ, Ahern C et al. Postal survey of physicians and laboratories: practices and perceptions of molecular oncology testing. *BMC Health Serv Res* 2009;9:131.
22. Miller FA, Carroll JCC, Wilson BJ et al. The primary care physician role in cancer genetics: a qualitative study of patient experience. *Fam Pract* 2010;27(5):563-569.
23. Adair A, Hyde-Lay R, Einsiedel E et al. Technology assessment and resource allocation for predictive genetic testing: A study of the perspectives of Canadian genetic health care providers. *BMC Med Ethics* 2009;10(1): 6.
24. Little J, Potter B, Allanson J et al. Canada: public health genomics. *Public Health Genomics* 2009; 12,(2):112-120.
25. Vovici Survey Software, <http://www.vovici.com/>
26. StataCorp. 2009. Stata Statistical Software: Release 11. College Station, TX: StataCorp LP.
27. Carroll JC, Cappelli M, Miller F et al. Genetic services for hereditary breast/ovarian and colorectal cancers - physicians' awareness, use and satisfaction. *J Community Genet* 2008;11(1): 43-51.
28. <https://www.medcoresearchinstitute.com/community/pharmacogenomics/physiciansurvey;jsessionid=14BFD8577F0BC0699643349A4B9F2FFA.node0>. Accessed November 2010.
29. Ohata T, Tsuchiya A, Watanabe M, Sumida T et al. Physicians' opinion for 'new' genetic testing in Japan. *J Hum Genet* 2009;54(4):203-208.
30. Lamb NE, Myers RM, Gunter C. Education and personalized genomics: deciphering the public's genetic health report. *Personalized Medicine* 2009;6(6):681.

- 1
  - 2
  - 3
  - 4
  - 5
  - 6
  - 7
  - 8
  - 9
  - 10
  - 11
  - 12
  - 13
  - 14
  - 15
  - 16
  - 17
  - 18
  - 19
  - 20
  - 21
  - 22
  - 23
  - 24
  - 25
  - 26
  - 27
  - 28
  - 29
  - 30
  - 31
  - 32
  - 33
  - 34
  - 35
  - 36
  - 37
  - 38
  - 39
  - 40
  - 41
  - 42
  - 43
  - 44
  - 45
  - 46
  - 47
  - 48
  - 49
  - 50
  - 51
  - 52
  - 53
  - 54
  - 55
  - 56
  - 57
  - 58
  - 59
  - 60
31. <http://www.ccgf-cceg.ca/sites/default/files/2010-04-14%20-%20Introduction%20of%20BillC-508%20-%20Genetic%20Discrimination.pdf>. Accessed November 2010.
32. Bloss CS, Schork NJ, Topol EJ. Effect of direct-to-consumer genomewide profiling to assess disease risk. *N Engl J Med* 2011;364(6):524-534.
33. Adair A, Hyde-Lay R, Einsiedel E et al. Technology assessment and resource allocation for predictive genetic testing: A study of the perspectives of Canadian genetic health care providers. *BMC Med Ethics* 2009;10(1):6.
34. Ontario Genetics Secretariat. 2009. Genetic Testing, Services and Research, Contributing to the Future Health of Ontarians. White Paper. February 26.
35. Fackler JL, McGuire AL. Paving the Way to Personalized Genomic Medicine: Steps to Successful Implementation. *Curr Pharmacogenomics Person Med* 2009;7(2):125-132.
36. Kawamoto K, Lobach DF, Willard HF et al. A national clinical decision support infrastructure to enable the widespread and consistent practice of genomic and personalized medicine. *BMC Med Inform Decis Mak* 2009;9:17.
37. Downing GJ. Key aspects of health system change on the path to personalized medicine. *J Lab Clin Med* 2009; 154, no. 6 (December): 272-276.
38. [https://www.infoway-inforoute.ca/flash/lang-en/ar2009-2010/docs/CHI\\_AnnualReport\\_2009-2010\\_ENG.pdf](https://www.infoway-inforoute.ca/flash/lang-en/ar2009-2010/docs/CHI_AnnualReport_2009-2010_ENG.pdf). Accessed November 2010.
39. Green JS, O'Brien TJ, Chiappinelli VA et al. Pharmacogenomics instruction in US and Canadian medical schools: implications for personalized medicine. *Pharmacogenomics* 11,(9):1331-1340.
40. Bellcross CA, Kolor K, Goddard KA et al. Awareness and utilization of BRCA1/2 testing among U.S. primary care physicians. *Am J Prev Med* 2011;40(1):61-66.
41. Wu AC, Fuhlbrigge AL. Economic evaluation of pharmacogenetic tests. *Clin Pharmacol Ther* 2008;84,(2):272-274.
42. Phillips KA, Marshall DA, Haas JS et al. Clinical practice patterns and cost effectiveness of human epidermal growth receptor 2 testing strategies in breast cancer patients. *Cancer* 2009; 115,(22):5166-5174.
43. Christensen, Clayton. . The innovator's prescription: a disruptive solution for health care. New York: McGraw-Hill 2009.
44. Everett M. Rogers, Diffusion of Innovations, 4th ed., New York: The Free Press 1995.

STROBE 2007 (v4) Statement—Checklist of items that should be included in reports of *cross-sectional studies*

| Section/Topic                | Item # | Recommendation                                                                                                                                                                       | Reported on page # |
|------------------------------|--------|--------------------------------------------------------------------------------------------------------------------------------------------------------------------------------------|--------------------|
| Title and abstract           | 1      | (a) Indicate the study's design with a commonly used term in the title or the abstract                                                                                               | 1                  |
|                              |        | (b) Provide in the abstract an informative and balanced summary of what was done and what was found                                                                                  | 2                  |
| <b>Introduction</b>          |        |                                                                                                                                                                                      |                    |
| Background/rationale         | 2      | Explain the scientific background and rationale for the investigation being reported                                                                                                 | 4                  |
| Objectives                   | 3      | State specific objectives, including any prespecified hypotheses                                                                                                                     | 5                  |
| <b>Methods</b>               |        |                                                                                                                                                                                      |                    |
| Study design                 | 4      | Present key elements of study design early in the paper                                                                                                                              | 5                  |
| Setting                      | 5      | Describe the setting, locations, and relevant dates, including periods of recruitment, exposure, follow-up, and data collection                                                      | 5                  |
| Participants                 | 6      | (a) Give the eligibility criteria, and the sources and methods of selection of participants                                                                                          | 5                  |
| Variables                    | 7      | Clearly define all outcomes, exposures, predictors, potential confounders, and effect modifiers. Give diagnostic criteria, if applicable                                             | 6                  |
| Data sources/<br>measurement | 8*     | For each variable of interest, give sources of data and details of methods of assessment (measurement). Describe comparability of assessment methods if there is more than one group | 5                  |
| Bias                         | 9      | Describe any efforts to address potential sources of bias                                                                                                                            | 6                  |
| Study size                   | 10     | Explain how the study size was arrived at                                                                                                                                            | 6                  |
| Quantitative variables       | 11     | Explain how quantitative variables were handled in the analyses. If applicable, describe which groupings were chosen and why                                                         | 6                  |
| Statistical methods          | 12     | (a) Describe all statistical methods, including those used to control for confounding                                                                                                | 6                  |
|                              |        | (b) Describe any methods used to examine subgroups and interactions                                                                                                                  | 6                  |
|                              |        | (c) Explain how missing data were addressed                                                                                                                                          | 6                  |
|                              |        | (d) If applicable, describe analytical methods taking account of sampling strategy                                                                                                   | 6                  |
|                              |        | (e) Describe any sensitivity analyses                                                                                                                                                | 6                  |
| <b>Results</b>               |        |                                                                                                                                                                                      |                    |

|                          |     |                                                                                                                                                                                                              |         |
|--------------------------|-----|--------------------------------------------------------------------------------------------------------------------------------------------------------------------------------------------------------------|---------|
| Participants             | 13* | (a) Report numbers of individuals at each stage of study—eg numbers potentially eligible, examined for eligibility, confirmed eligible, included in the study, completing follow-up, and analysed            | 6       |
|                          |     | (b) Give reasons for non-participation at each stage                                                                                                                                                         | 6       |
|                          |     | (c) Consider use of a flow diagram                                                                                                                                                                           |         |
| Descriptive data         | 14* | (a) Give characteristics of study participants (eg demographic, clinical, social) and information on exposures and potential confounders                                                                     | 6       |
|                          |     | (b) Indicate number of participants with missing data for each variable of interest                                                                                                                          | 6       |
| Outcome data             | 15* | Report numbers of outcome events or summary measures                                                                                                                                                         | N/A     |
| Main results             | 16  | (a) Give unadjusted estimates and, if applicable, confounder-adjusted estimates and their precision (eg, 95% confidence interval). Make clear which confounders were adjusted for and why they were included | 6 - 9   |
|                          |     | (b) Report category boundaries when continuous variables were categorized                                                                                                                                    | 6 - 9   |
|                          |     | (c) If relevant, consider translating estimates of relative risk into absolute risk for a meaningful time period                                                                                             | N/A     |
| Other analyses           | 17  | Report other analyses done—eg analyses of subgroups and interactions, and sensitivity analyses                                                                                                               | 6 - 9   |
| <b>Discussion</b>        |     |                                                                                                                                                                                                              |         |
| Key results              | 18  | Summarise key results with reference to study objectives                                                                                                                                                     | 9       |
| Limitations              | 19  | Discuss limitations of the study, taking into account sources of potential bias or imprecision. Discuss both direction and magnitude of any potential bias                                                   | 14      |
| Interpretation           | 20  | Give a cautious overall interpretation of results considering objectives, limitations, multiplicity of analyses, results from similar studies, and other relevant evidence                                   | 9 - 13  |
| Generalisability         | 21  | Discuss the generalisability (external validity) of the study results                                                                                                                                        | 12 - 13 |
| <b>Other information</b> |     |                                                                                                                                                                                                              |         |
| Funding                  | 22  | Give the source of funding and the role of the funders for the present study and, if applicable, for the original study on which the present article is based                                                | 14      |

\*Give information separately for cases and controls in case-control studies and, if applicable, for exposed and unexposed groups in cohort and cross-sectional studies.

**Note:** An Explanation and Elaboration article discusses each checklist item and gives methodological background and published examples of transparent reporting. The STROBE checklist is best used in conjunction with this article (freely available on the Web sites of PLoS Medicine at <http://www.plosmedicine.org/>, Annals of Internal Medicine at <http://www.annals.org/>, and Epidemiology at <http://www.epidem.com/>). Information on the STROBE Initiative is available at [www.strobe-statement.org](http://www.strobe-statement.org).

1  
2  
3  
4  
5  
6  
7  
8  
9  
10  
11  
12  
13  
14  
15  
16  
17  
18  
19  
20  
21  
22  
23  
24  
25  
26  
27  
28  
29  
30  
31  
32  
33  
34  
35  
36  
37  
38  
39  
40  
41  
42  
43  
44  
45  
46  
47  
48  
49  
50  
51  
52  
53  
54  
55  
56  
57  
58  
59  
60

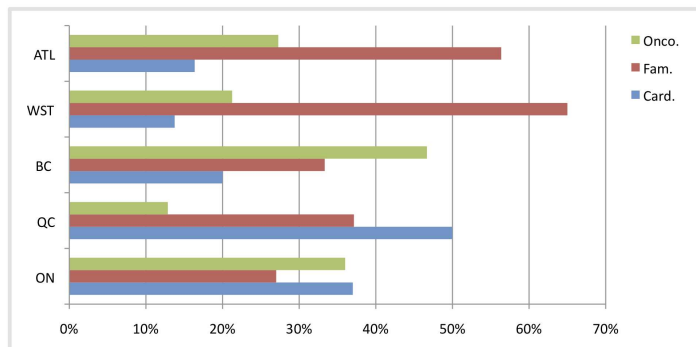

Figure 1: Distribution of respondents by specialty (panel A); family medicine (Fam.), Cardiology (Card.) and oncology (Onco.) and by geography (panel B); Ontario (ON), Quebec (QC), British Columbia (BC), Western Provinces (WST) and Atlantic Provinces (ALT).

215x279mm (300 x 300 DPI)

1  
2  
3  
4  
5  
6  
7  
8  
9  
10  
11  
12  
13  
14  
15  
16  
17  
18  
19  
20  
21  
22  
23  
24  
25  
26  
27  
28  
29  
30  
31  
32  
33  
34  
35  
36  
37  
38  
39  
40  
41  
42  
43  
44  
45  
46  
47  
48  
49  
50  
51  
52  
53  
54  
55  
56  
57  
58  
59  
60

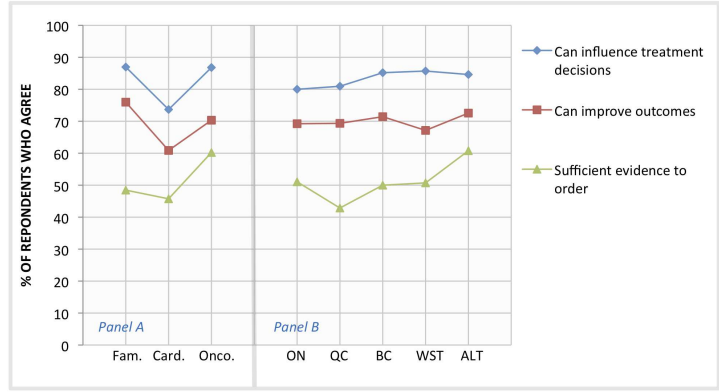

Figure 2: Respondents' perceptions of utility by specialty (panel A); family medicine (Fam.), Cardiology (Card.) and oncology (Onco.) and by geography (panel B); Ontario (ON), Quebec (QC), British Columbia (BC), Western Provinces (WST) and Atlantic Provinces (ALT).

215x279mm (300 x 300 DPI)

1  
2  
3  
4  
5  
6  
7  
8  
9  
10  
11  
12  
13  
14  
15  
16  
17  
18  
19  
20  
21  
22  
23  
24  
25  
26  
27  
28  
29  
30  
31  
32  
33  
34  
35  
36  
37  
38  
39  
40  
41  
42  
43  
44  
45  
46  
47  
48  
49  
50  
51  
52  
53  
54  
55  
56  
57  
58  
59  
60

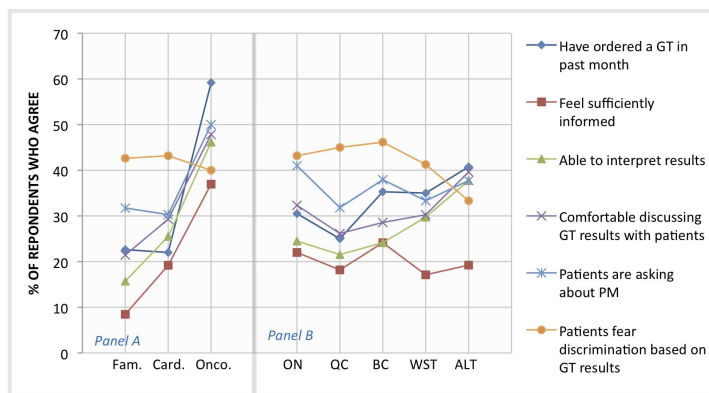

Figure 3: Measures of state of practice by specialty (panel A); family medicine (Fam.), Cardiology (Card.) and oncology (Onco.) and by geography (panel B); Ontario (ON), Quebec (QC), British Columbia (BC), Western Provinces (WST) and Atlantic Provinces (ALT).

215x279mm (300 x 300 DPI)



1  
2  
3  
4  
5  
6  
7  
8  
9  
10  
11  
12  
13  
14  
15  
16  
17  
18  
19  
20  
21  
22  
23  
24  
25  
26  
27  
28  
29  
30  
31  
32  
33  
34  
35  
36  
37  
38  
39  
40  
41  
42  
43  
44  
45  
46  
47  
48  
49  
50  
51  
52  
53  
54  
55  
56  
57  
58  
59  
60

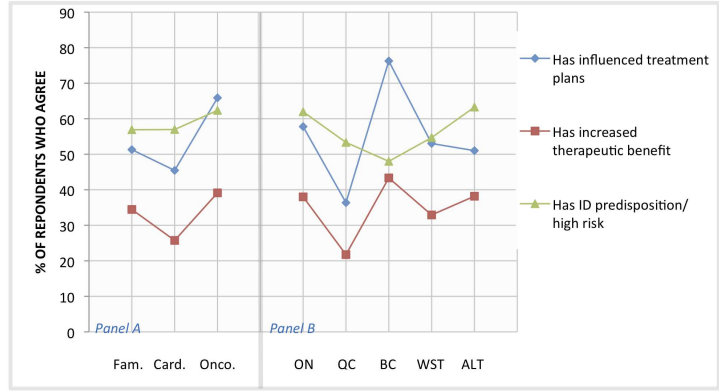

**Figure 4:** Comparison of reported impacts and benefits by specialty (panel A); family medicine (Fam.), Cardiology (Card.) and oncology (Onco.) and by geography (panel B); Ontario (ON), Quebec (QC), British Columbia (BC), Western Provinces (WST) and Atlantic Provinces (ALT).

215x279mm (300 x 300 DPI)

1  
2  
3  
4  
5  
6  
7  
8  
9  
10  
11  
12  
13  
14  
15  
16  
17  
18  
19  
20  
21  
22  
23  
24  
25  
26  
27  
28  
29  
30  
31  
32  
33  
34  
35  
36  
37  
38  
39  
40  
41  
42  
43  
44  
45  
46  
47  
48  
49  
50  
51  
52  
53  
54  
55  
56  
57  
58  
59  
60

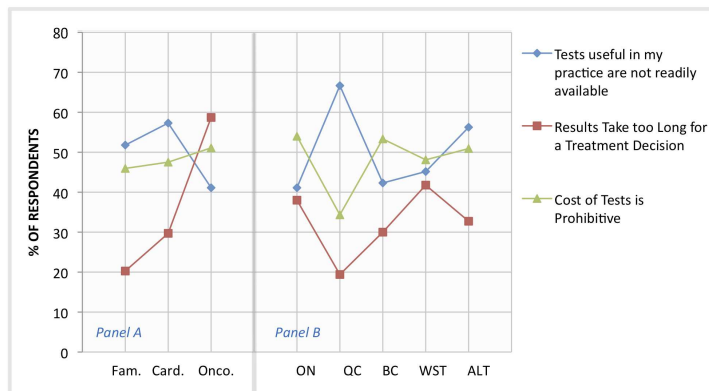

**Figure 5:** Measures of barriers to access by specialty (panel A); family medicine (Fam.), Cardiology (Card.) and oncology (Onco.) and by geography (panel B); Ontario (ON), Quebec (QC), British Columbia (BC), Western Provinces (WST) and Atlantic Provinces (ALT).

215x279mm (300 x 300 DPI)

1  
2  
3  
4  
5  
6  
7  
8  
9  
10  
11  
12  
13  
14  
15  
16  
17  
18  
19  
20  
21  
22  
23  
24  
25  
26  
27  
28  
29  
30  
31  
32  
33  
34  
35  
36  
37  
38  
39  
40  
41  
42  
43  
44  
45  
46  
47  
48  
49  
50  
51  
52  
53  
54  
55  
56  
57  
58  
59  
60

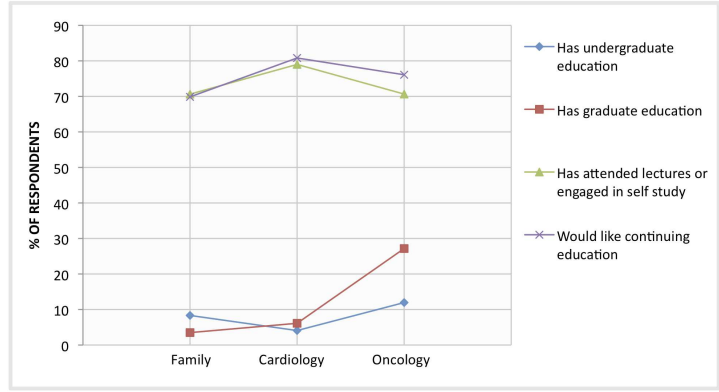

Figure 6: Measures of physician education in genetic testing and PM by specialty.

215x279mm (300 x 300 DPI)
